# Supplementary material for: Scrutinising the role of intramolecular hydrogen bonding in water exchange dynamics of Gd(iii) complexes
Source: Royal Society of Chemistry journal article supplement (doi:10.1039/d1dt00204j), 2021-01-01
Supplement: d1dt00204j1.pdf [file d1dt00204j1.pdf]

## Electronic Supplementary Information (ESI)

for

### Scrutinising the role of intramolecular hydrogen bonding in water exchange dynamics of Gd(III) complexes

*Loredana Leone,<sup>a</sup> Sara Camorali,<sup>a</sup> Antía Freire-García,<sup>b</sup> Carlos Platas-Iglesias,<sup>b\*</sup> David Esteban Gomez<sup>b</sup> and Lorenzo Tei<sup>a,\*</sup>*

- a. Dipartimento di Scienze e Innovazione Tecnologica (DiSIT). Università degli Studi del Piemonte Orientale "Amedeo Avogadro", Viale T. Michel 11, I-15121 Alessandria, Italy.  
E-mail: [lorenzo.tei@uniupo.it](mailto:lorenzo.tei@uniupo.it)
- b. Centro de Investigacións Científicas Avanzadas (CICA) and Departamento de Química, Facultade de Ciencias, Universidade da Coruña, 15071 A Coruña, Galicia, Spain  
E-mail: [carlos.platas.iglesias@udc.es](mailto:carlos.platas.iglesias@udc.es)

#### ESI Summary

1. <sup>1</sup>H NMR spectroscopic study on Eu<sup>III</sup> complexes (pag. 2)
2. Absorption spectra of the Eu<sup>III</sup> complexes (pag. 4)
3. Emission spectra and luminescence decay curves of the Eu<sup>III</sup> complexes (pag. 8)
4. pK<sub>a</sub> determination of DO3A-DiHAP (pag. 13)
5. <sup>1</sup>H and <sup>17</sup>O NMR Relaxometric data on Gd<sup>III</sup> complexes (pag. 14)
6. <sup>1</sup>H and <sup>13</sup>C NMR spectra of protected and deprotected ligands (pag. 17)
7. HPLC chromatograms and ESI-MS spectra of ligands and complexes (pag. 21)
8. Bond distances and optimized Cartesian coordinates for the Gd<sup>III</sup> complexes obtained with DFT calculations. (pag. 33)

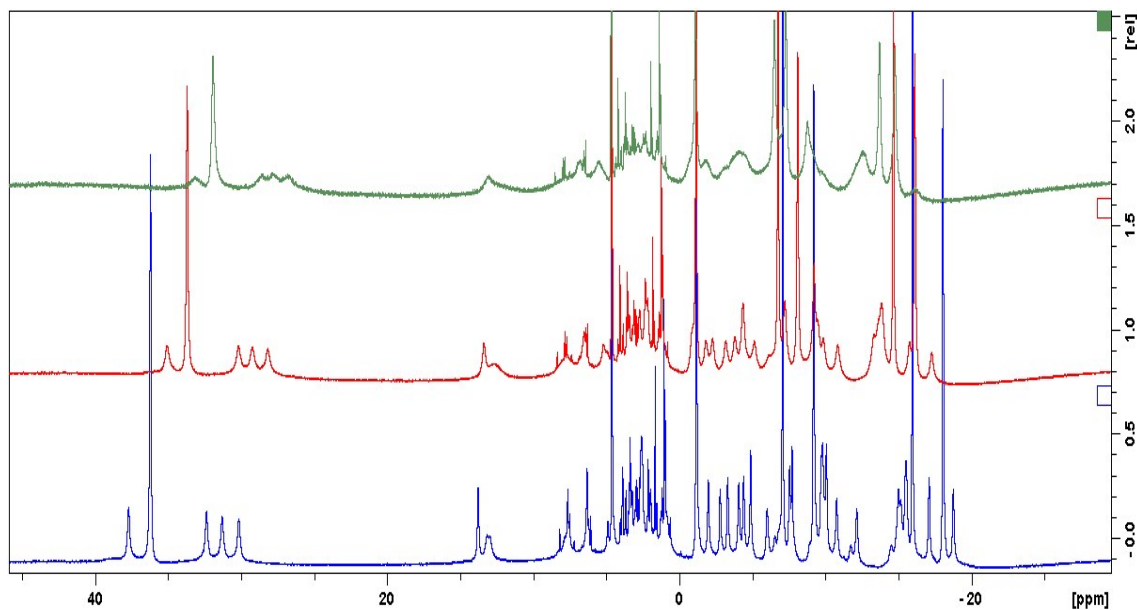

**Figure S1.**  $^1\text{H}$  NMR spectra at 310 K (top), 298K (middle) and 278 K (bottom) for EuDO3A-DiHAP ( $\text{D}_2\text{O}$ , pH 7).

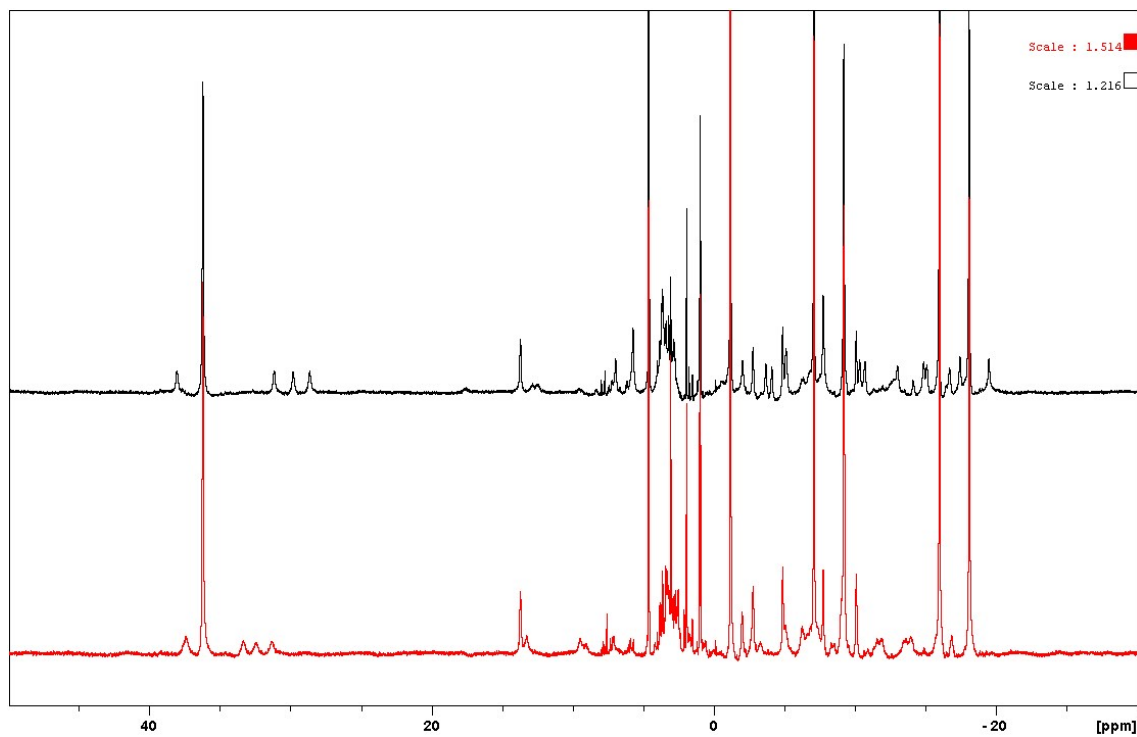

**Figure S2.**  $^1\text{H}$  NMR spectra at 283 K for EuDO3A-DiHAP ( $\text{D}_2\text{O}$ ) at pH 4 (top) and pH 9 (bottom).

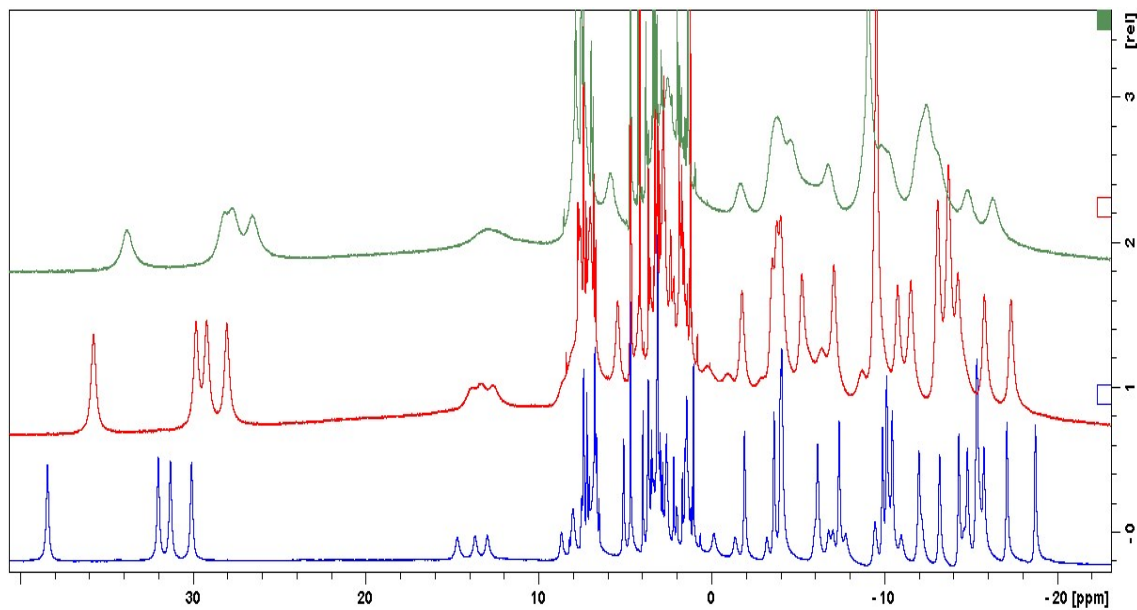

**Figure S3.**  $^1\text{H}$  NMR spectra at 310 K (top), 298K (middle) and 278 K (bottom) for EuDO3A-AnAP ( $\text{D}_2\text{O}$ , pH 7).

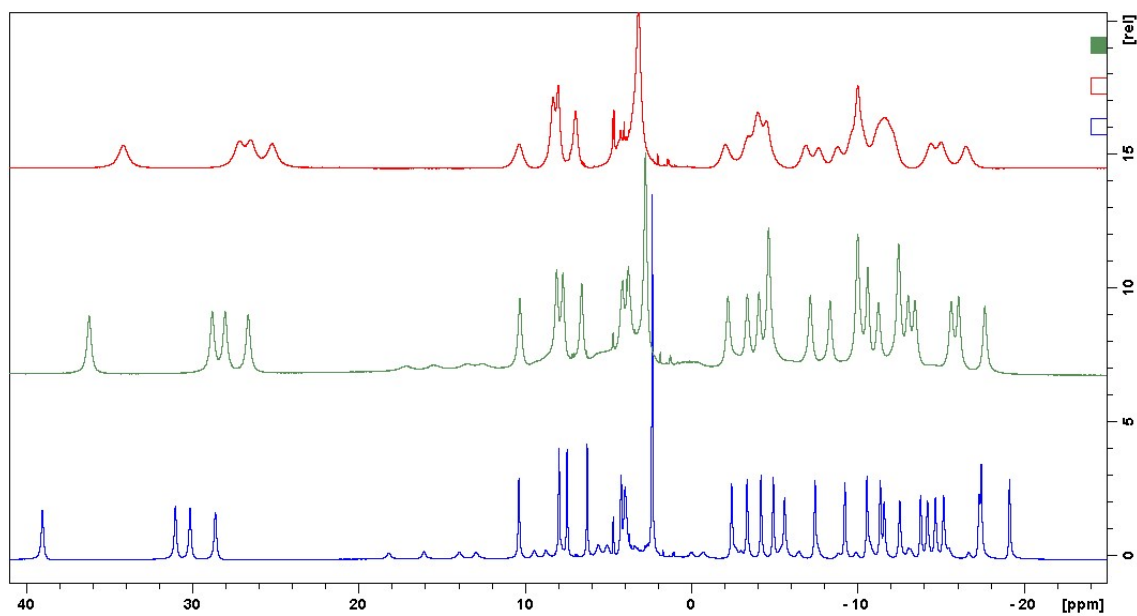

**Figure S4.**  $^1\text{H}$  NMR spectra at 310 K (top), 298K (middle) and 278 K (bottom) for EuDO3A-*o*MAP ( $\text{D}_2\text{O}$ , pH 7).

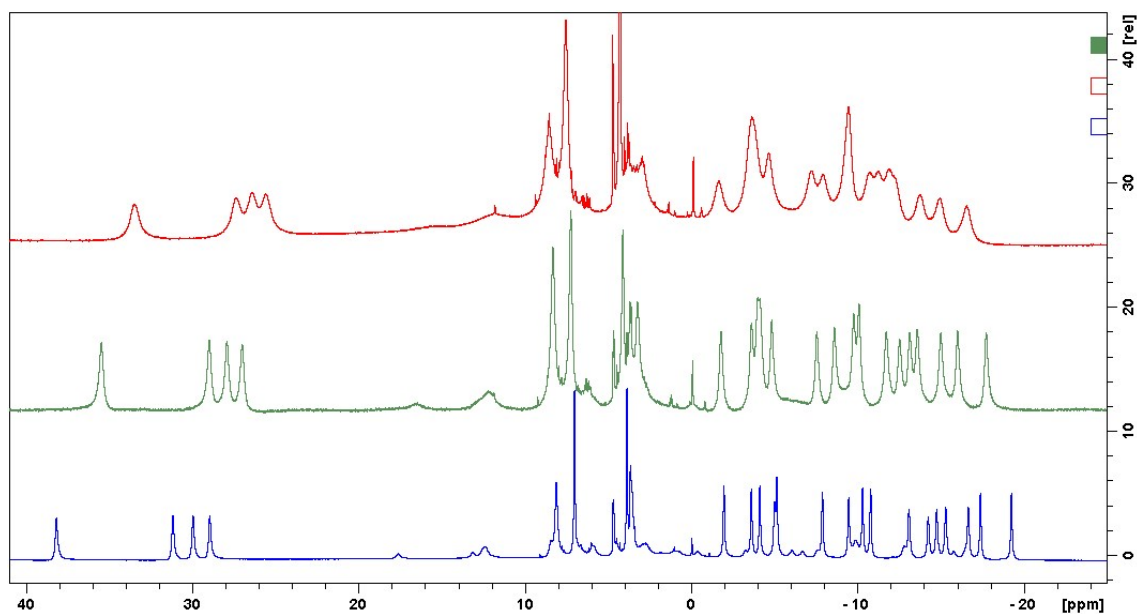

**Figure S5.** <sup>1</sup>H NMR spectra at 310 K (top), 298K (middle) and 278 K (bottom) for EuDO3A-pMAP (D<sub>2</sub>O, pH 7).

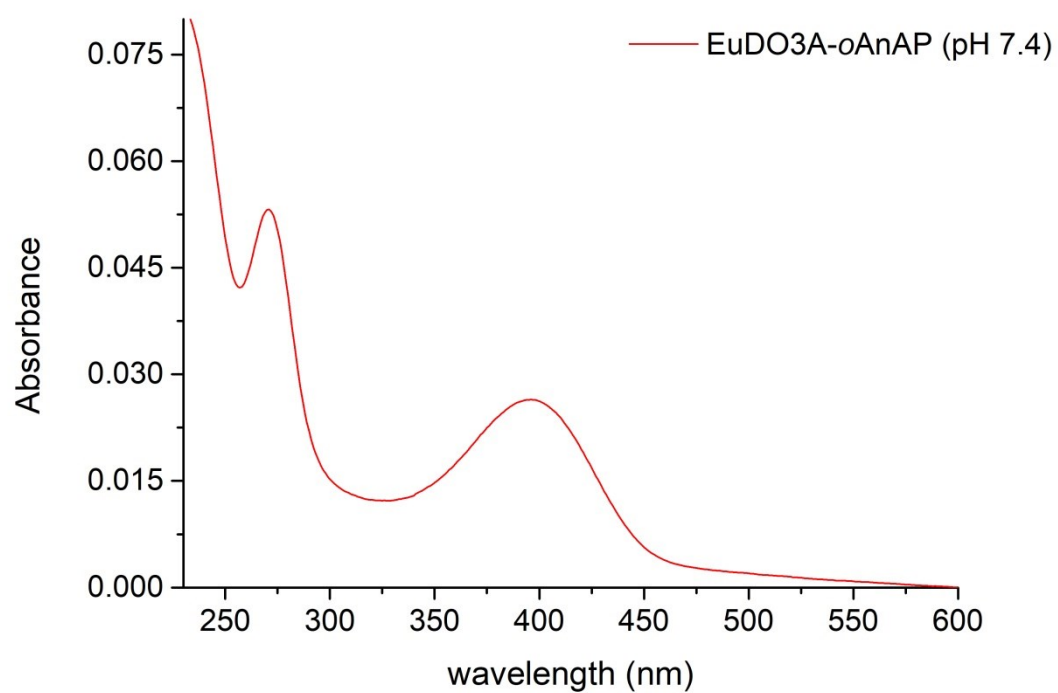

**Figure S6.** Absorption spectrum of the EuDO3A-oAnAP complex recorded in aqueous solution ( $10^{-4}$  M,  $d = 0.1$  cm).

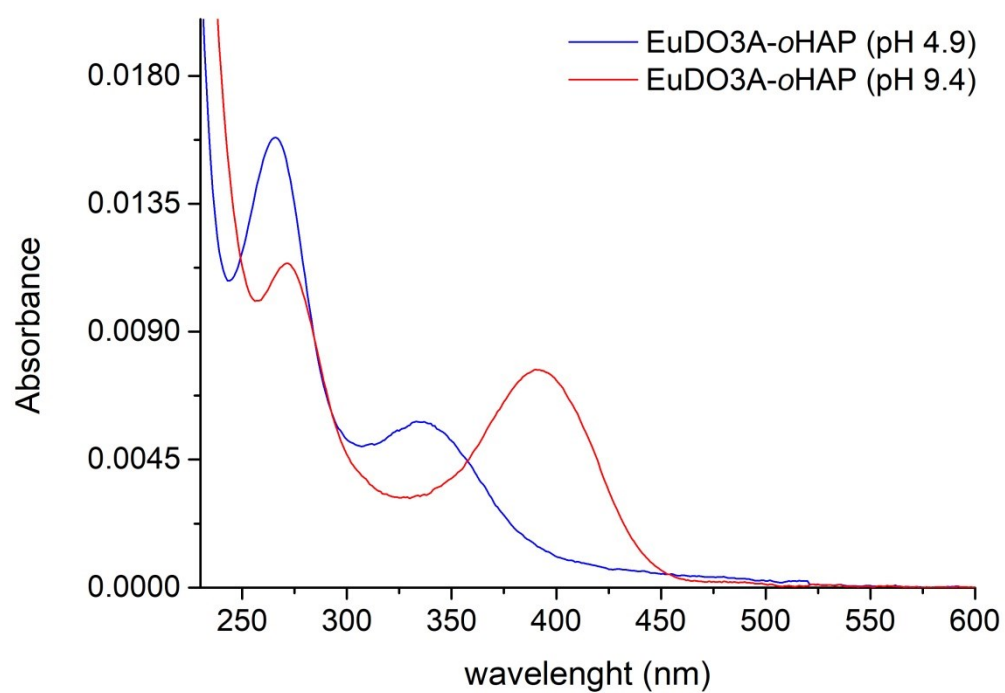

**Figure S7.** Absorption spectra of the EuDO3A-oHAP complex recorded in aqueous solution at different pH values ( $10^{-4}$  M,  $d = 0.1$  cm).

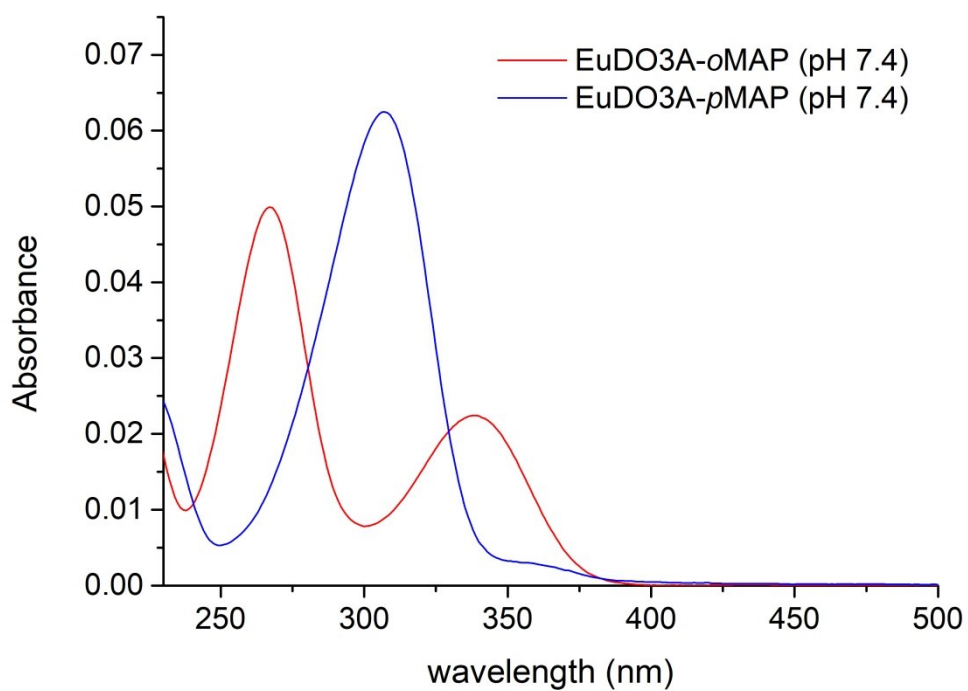

**Figure S8.** Absorption spectra of the EuDO3A-*o*MAP and EuDO3A-*p*MAP complexes recorded in aqueous solution at different pH values ( $10^{-4}$  M,  $d = 0.1$  cm).

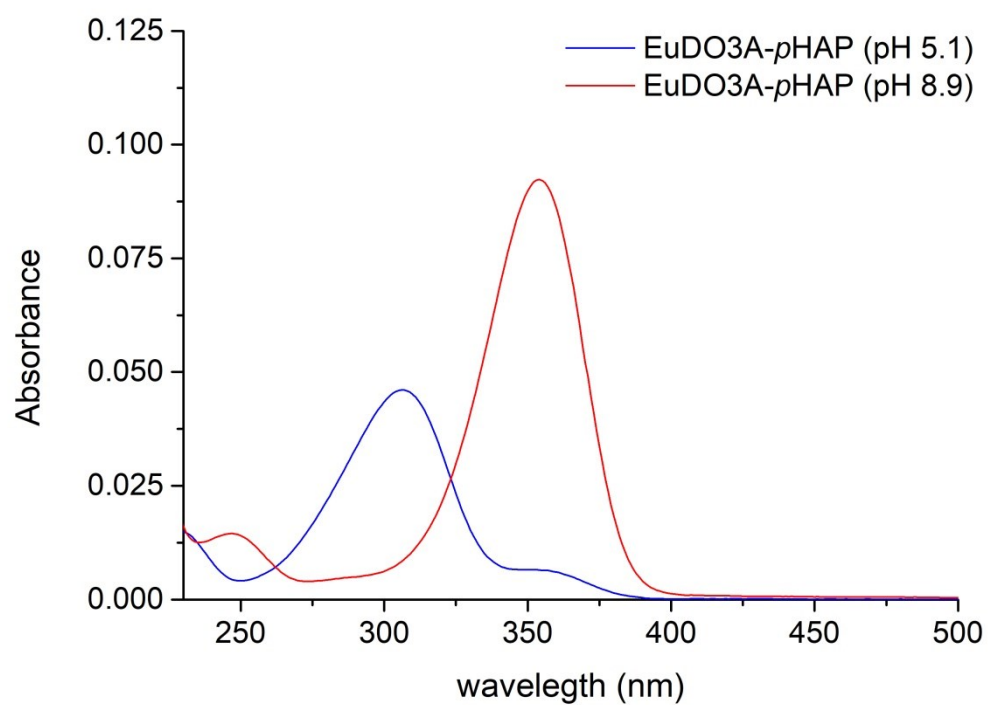

**Figure S9.** Absorption spectra of the EuDO3A-pHAP complex recorded in aqueous solution at different pH values ( $10^{-4}$  M,  $d = 0.1$  cm).

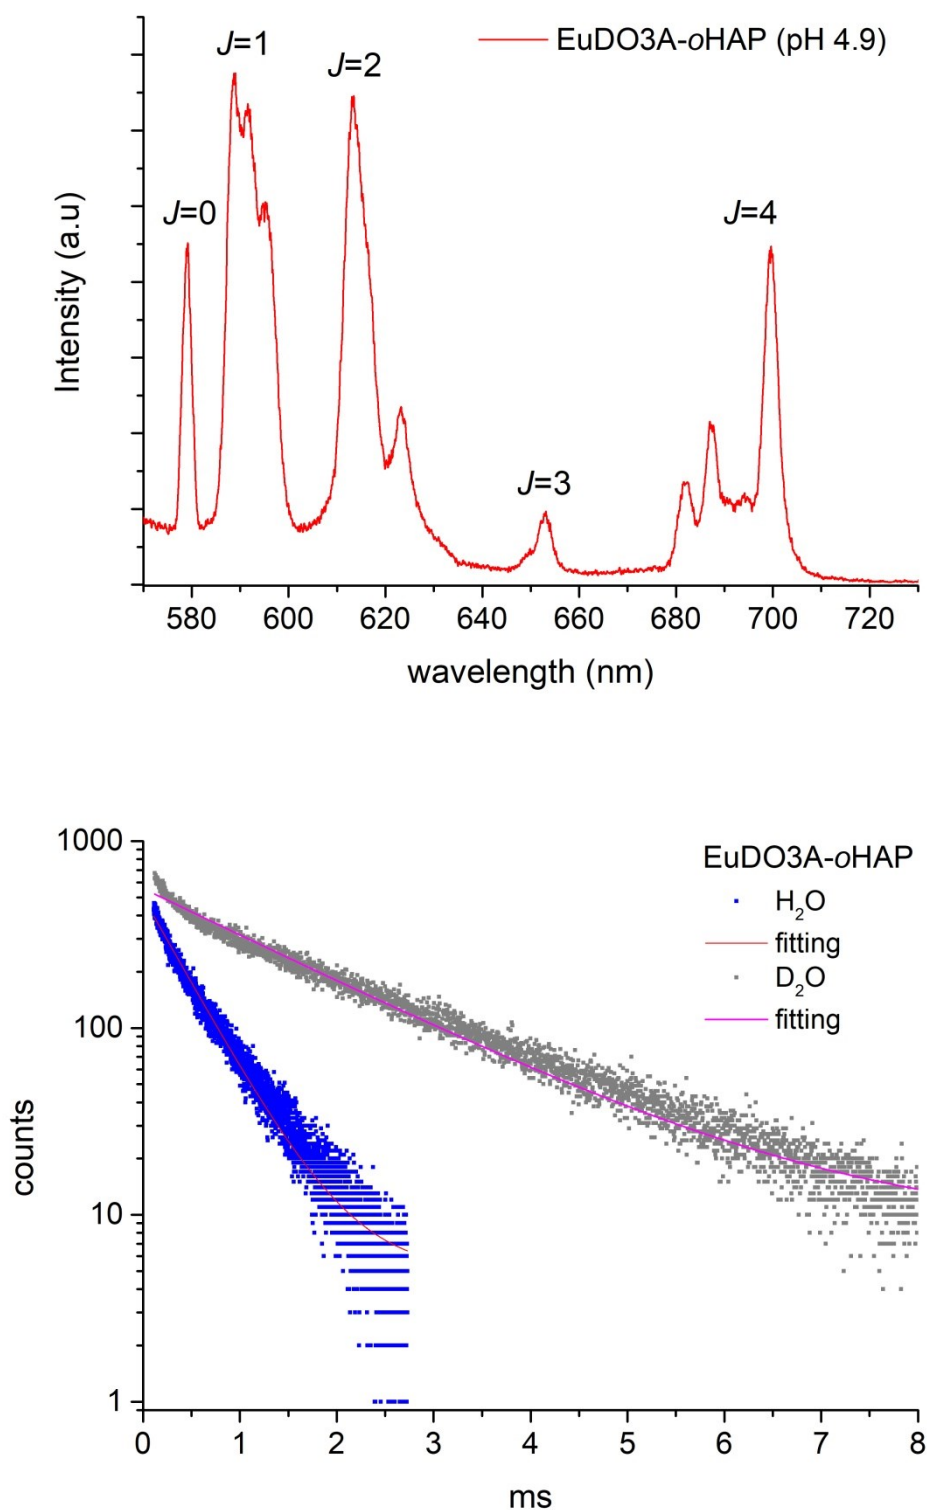

**Figure S10.** Emission spectrum (top) and decay curves (bottom) of the EuDO3A-*o*HAP complex ( $10^{-4}$  M, pH 4.9,  $\lambda_{\text{exc}} = 350$  nm, bandpass = 2 nm,  $\lambda_{\text{em}} = 613$  nm). The distortion of the baseline in the emission spectrum is due to residual ligand emission.



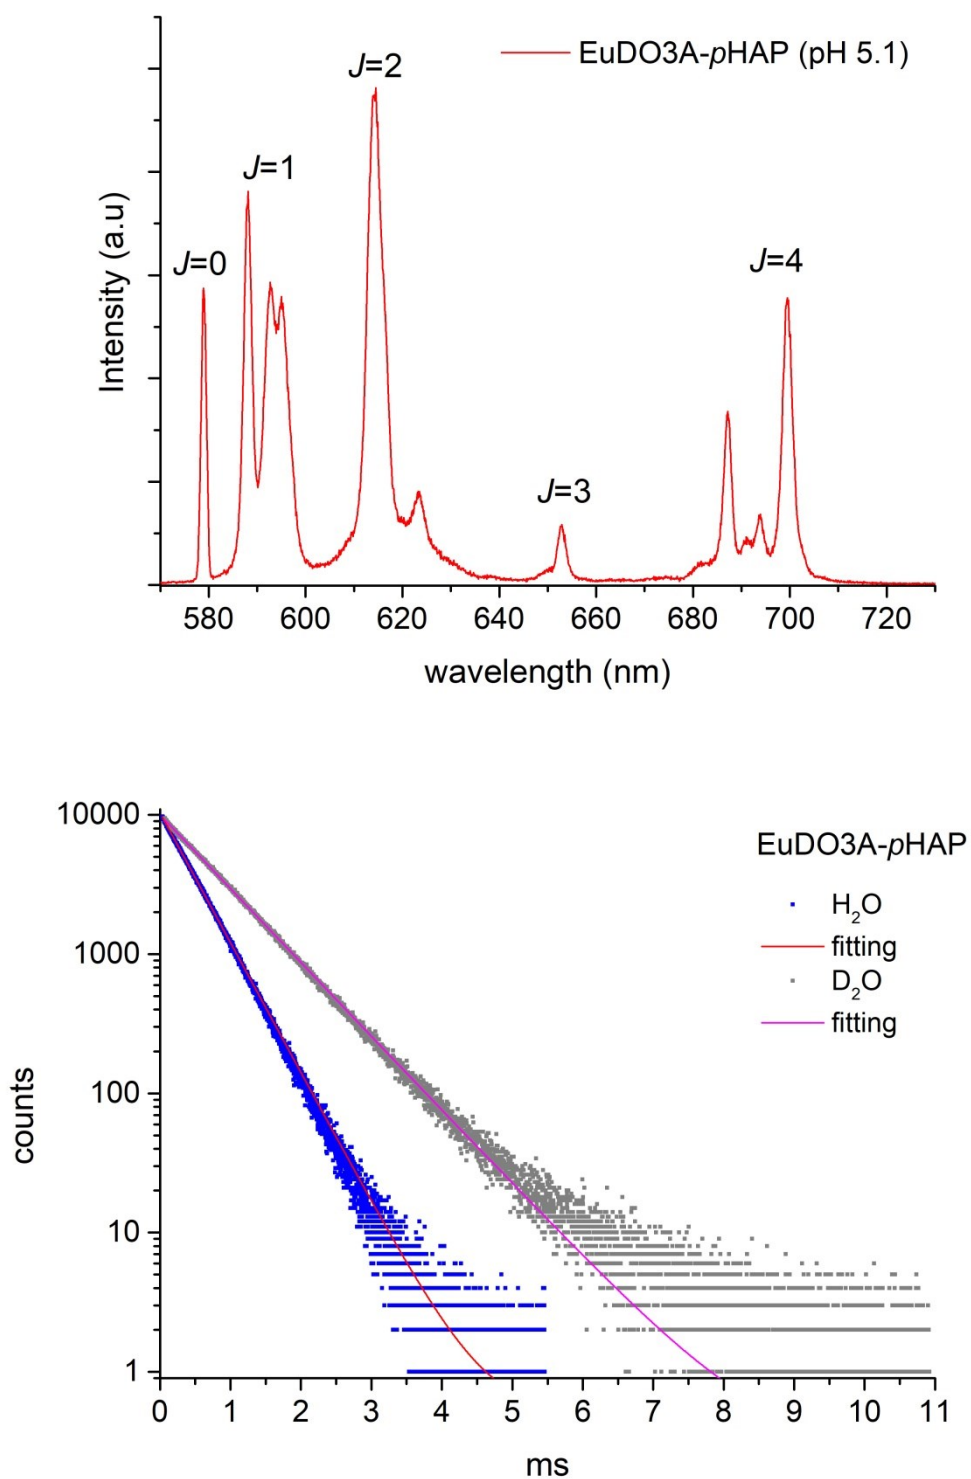

**Figure S11.** Emission spectrum (top) and decay curves (bottom) of the EuDO3A-*o*HAP complex ( $10^{-4}$  M, pH 5.1,  $\lambda_{\text{exc}} = 314$  nm, bandpass = 1 nm,  $\lambda_{\text{em}} = 613$  nm).

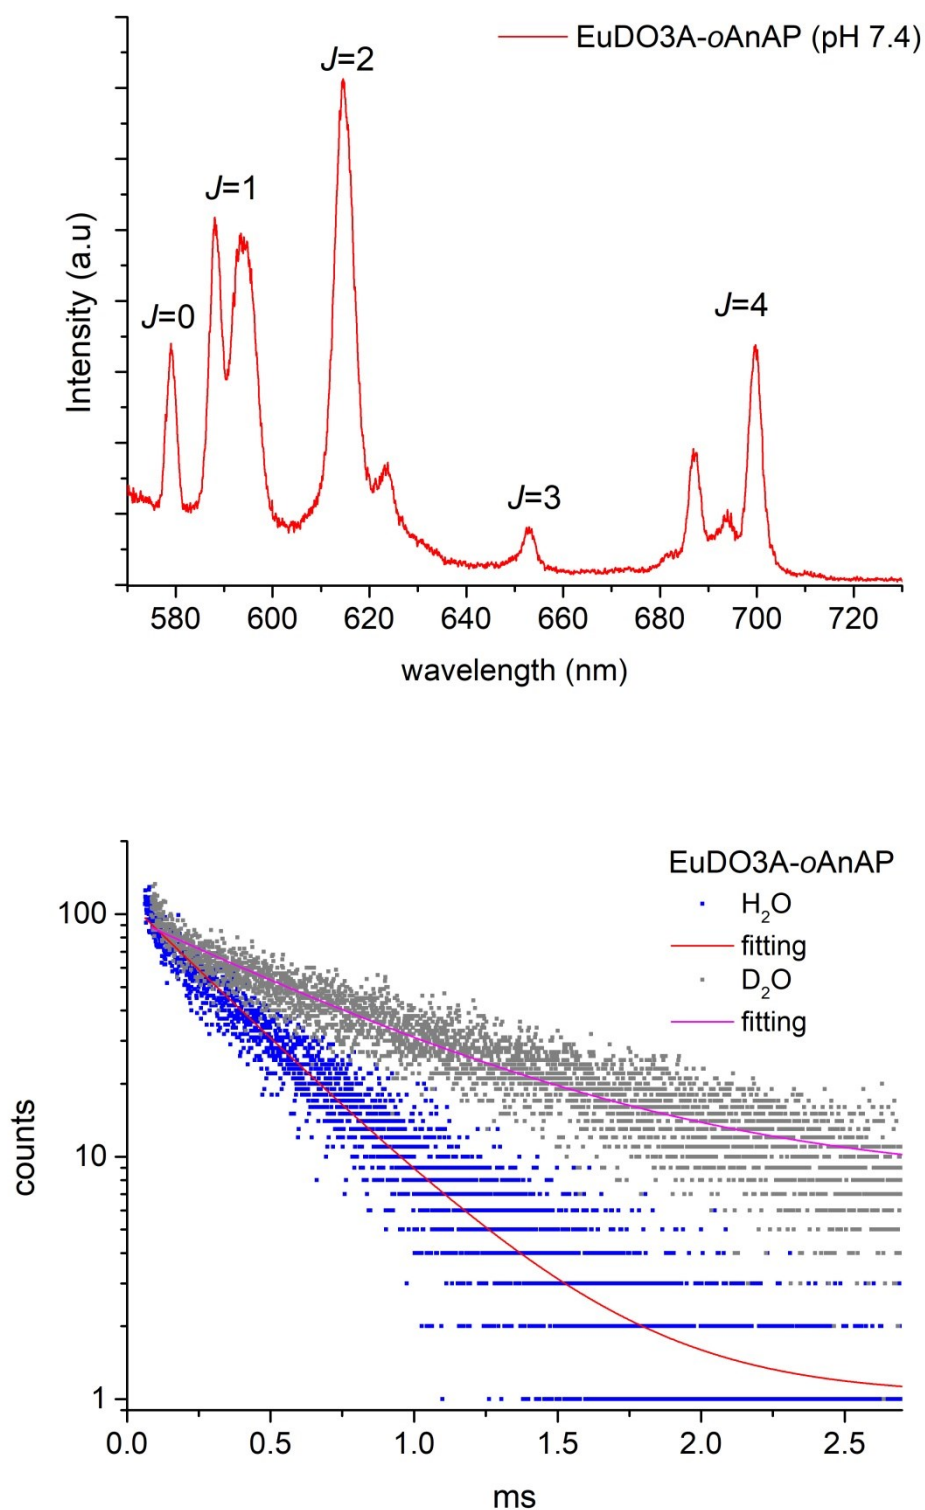

**Figure S12.** Emission spectrum (top) and decay curves (bottom) of the EuDO3A-*o*AnAP complex ( $10^{-4}$  M, pH 7.4,  $\lambda_{\text{exc}} = 400$  nm, bandpass = 2 nm,  $\lambda_{\text{em}} = 613$  nm). The distortion of the baseline in the emission spectrum is due to residual ligand emission.

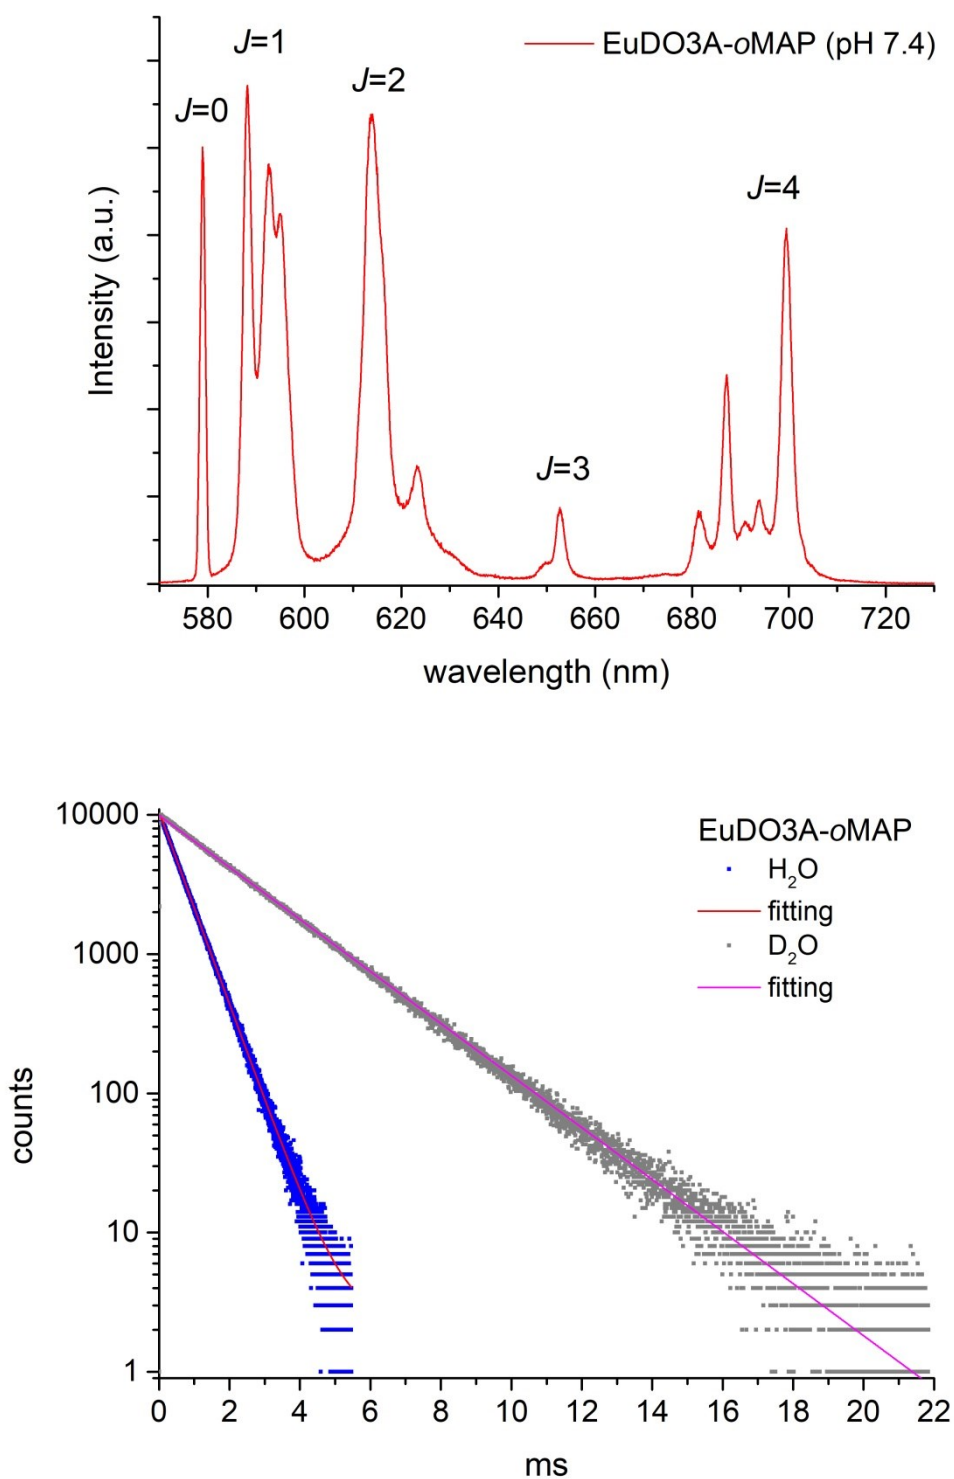

**Figure S13.** Emission spectrum (top) and decay curves (bottom) of the EuDO3A-*o*MAP complex ( $10^{-4}$  M, pH 7.4,  $\lambda_{\text{exc}} = 350$  nm, bandpass = 1 nm,  $\lambda_{\text{em}} = 613$  nm).

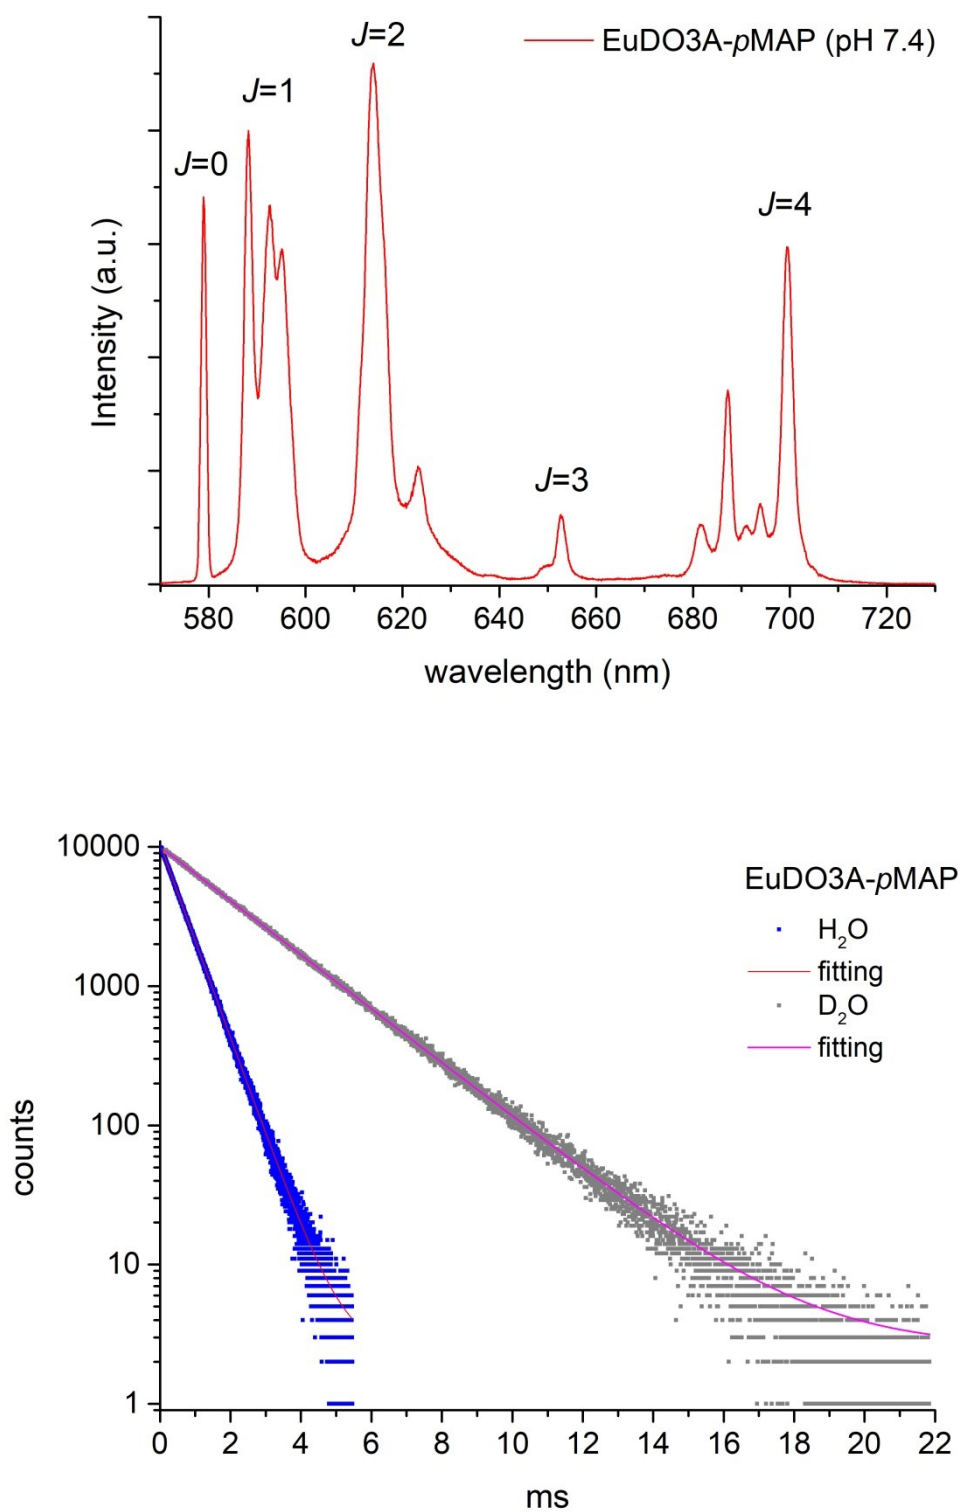

**Figure S14.** Emission spectrum (top) and decay curves (bottom) of the EuDO3A-*p*MAP complex ( $10^{-4}$  M, pH 7.4,  $\lambda_{\text{exc}} = 312$  nm, bandpass = 1 nm,  $\lambda_{\text{em}} = 613$  nm).

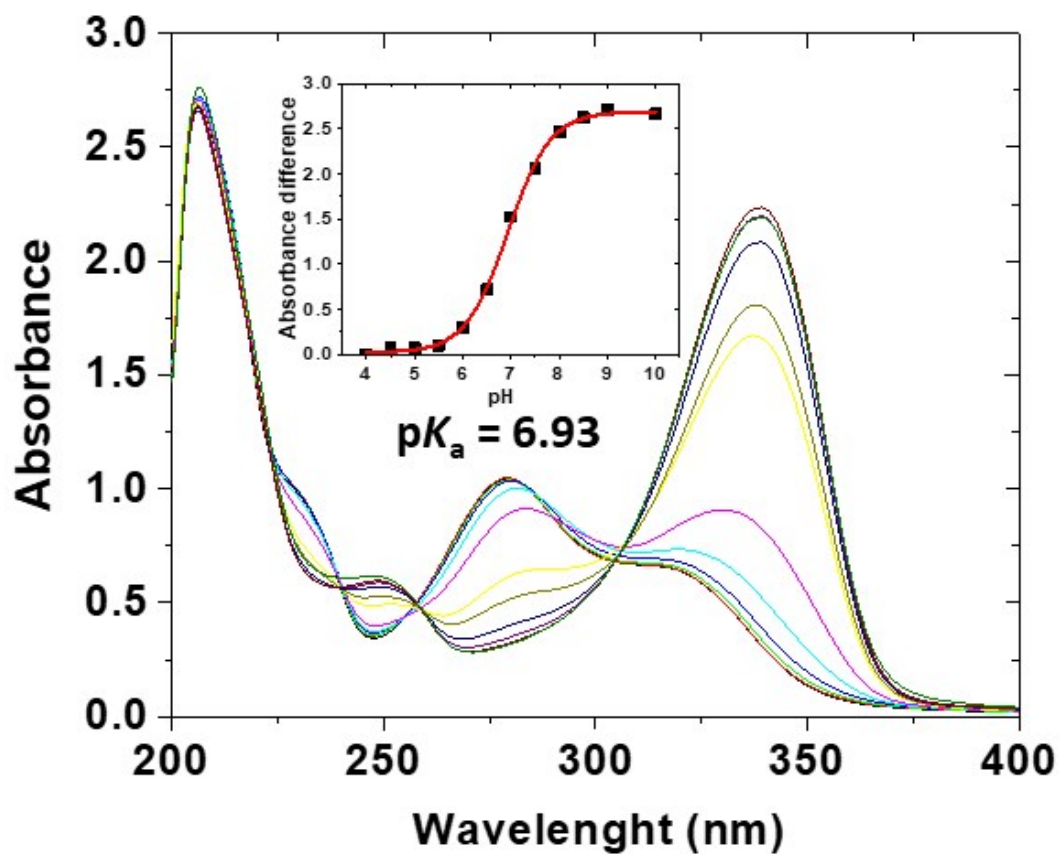

**Figure S15.** UV spectra ( $\lambda = 200\text{--}400\text{ nm}$ ) of DO3A-DiHAP ( $4 \times 10^{-4}\text{ M}$ ) in different aqueous solutions ranging from pH 4.1 to 10.2 (0.1 M NaCl, 298 K). The absorbances are normalized to zero for  $\lambda = 600\text{ nm}$ . Insert: plot of the total absorbance difference vs pH to determine the  $pK_a$ . The total absorbance difference is the sum of the absolute absorbance difference values at the chosen wavelengths (i.e. 280 and 340 nm).

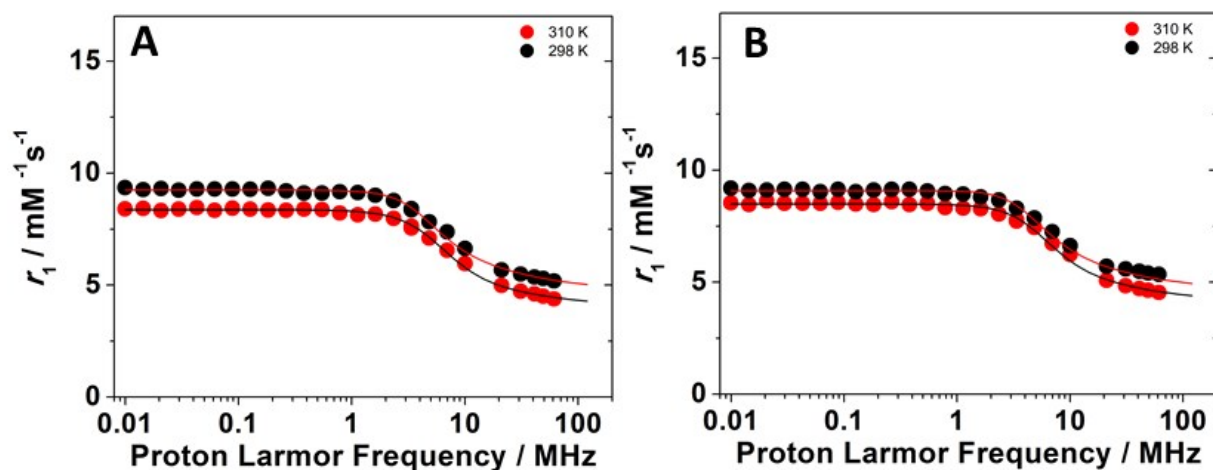

**Figure S16.**  $^1\text{H}$  NMRD profiles recorded at 298 (black) and 310 K (red) for (A) GdDO3A-*o*MAP at pH 7.4 and (B) GdDO3A-*p*MAP at pH 7.4.

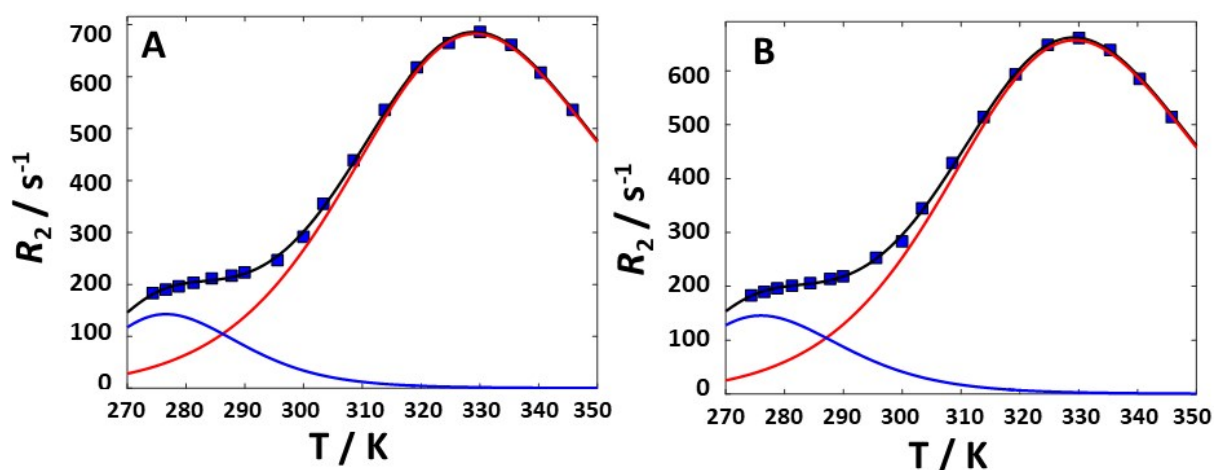

**Figure S17.** Transverse  $^{17}\text{O}$  NMR relaxation rates measured at 11.74 T and pH 7.4 for: (A) GdDO3A-*o*MAP (18.4 mM) and (B) GdDO3A-*p*MAP (19.2 mM). The red and blue lines represent the calculated contributions of the isomeric species SAP and TSAP, respectively.

**A**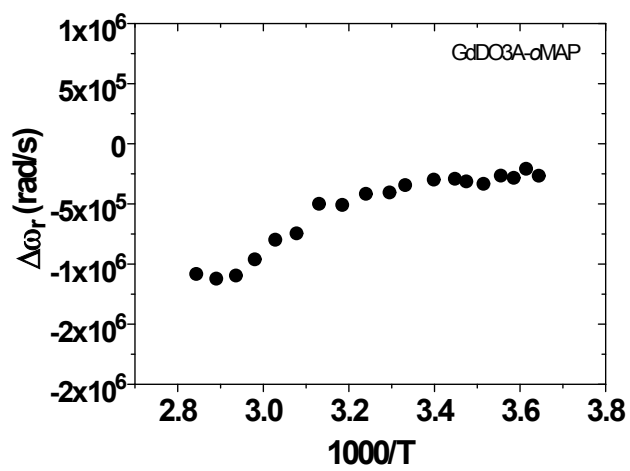**B**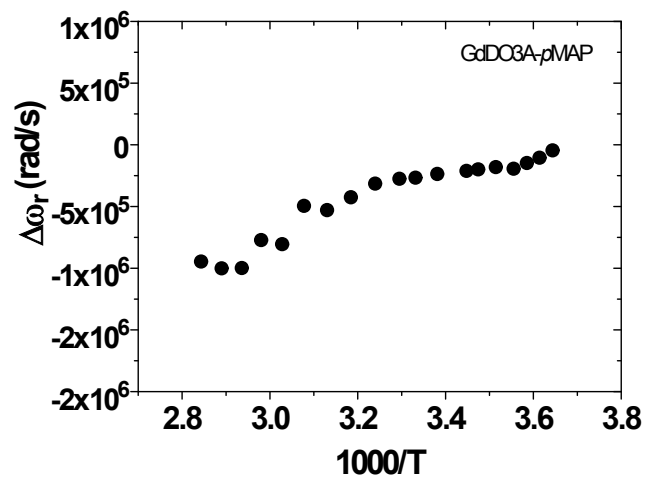

**Figure S18.** Reduced transverse  $^{17}\text{O}$  chemical shifts measured at 11.74 T (pH 7) for GdDO3A-*o*MAP (A) and GdDO3A-*p*MAP (B).

**A**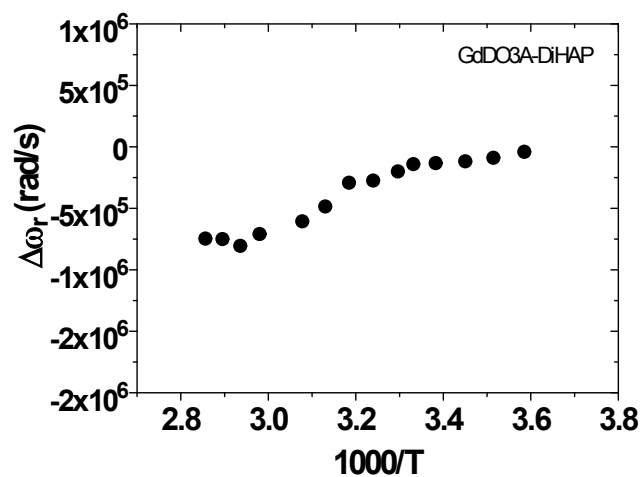**B**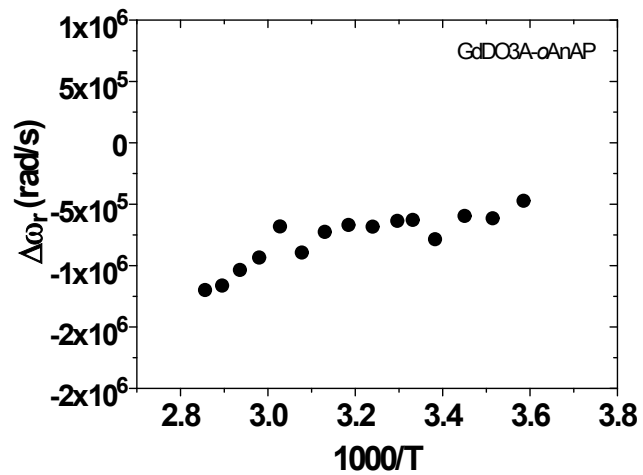

**Figure S19.** Reduced transverse  $^{17}\text{O}$  chemical shifts measured at 11.74 T (pH 7) for GdDO3A-DiHAP (A) and GdDO3A-oAnAP (B).



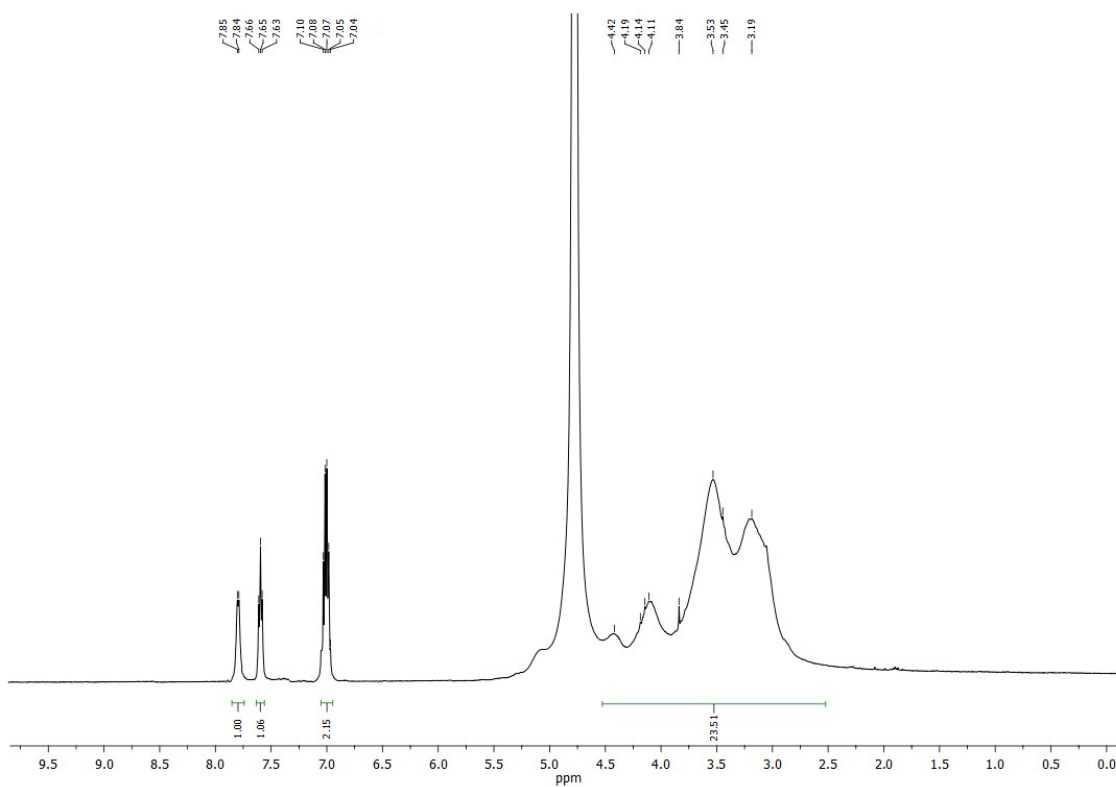

**Figure S20a.**  $^1\text{H}$  NMR spectrum of DO3A-oAnAP

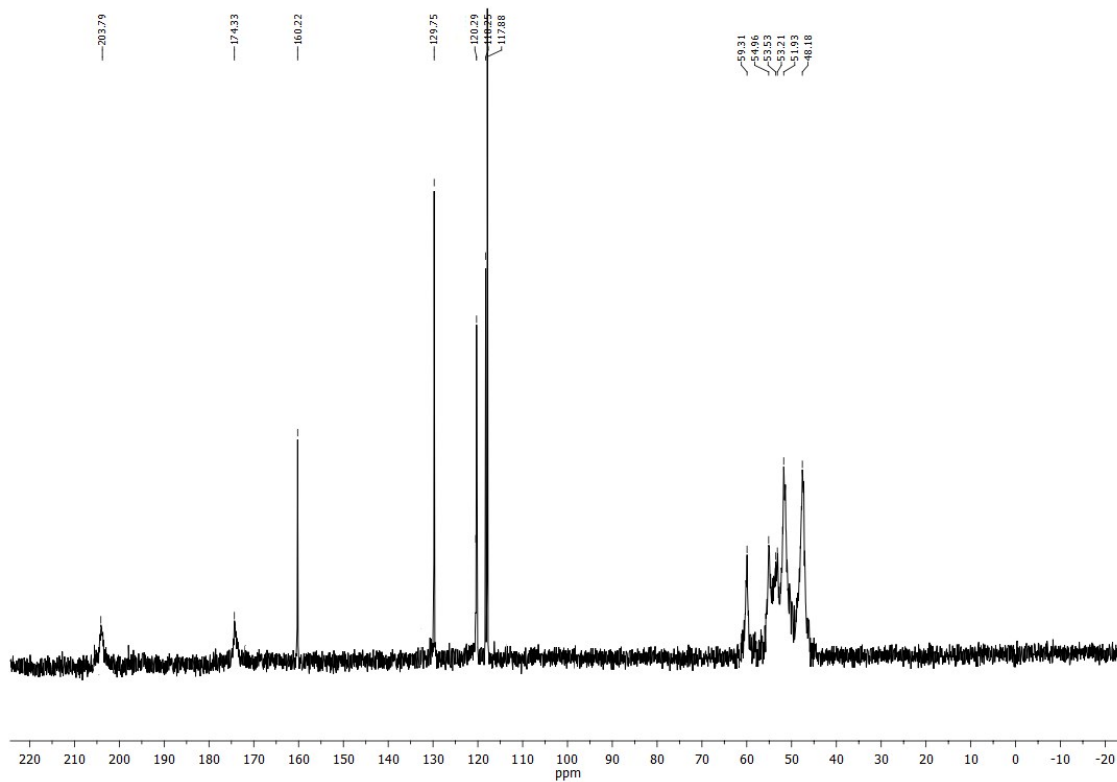

**Figure S20b.**  $^{13}\text{C}$  NMR spectrum of DO3A-oAnAP

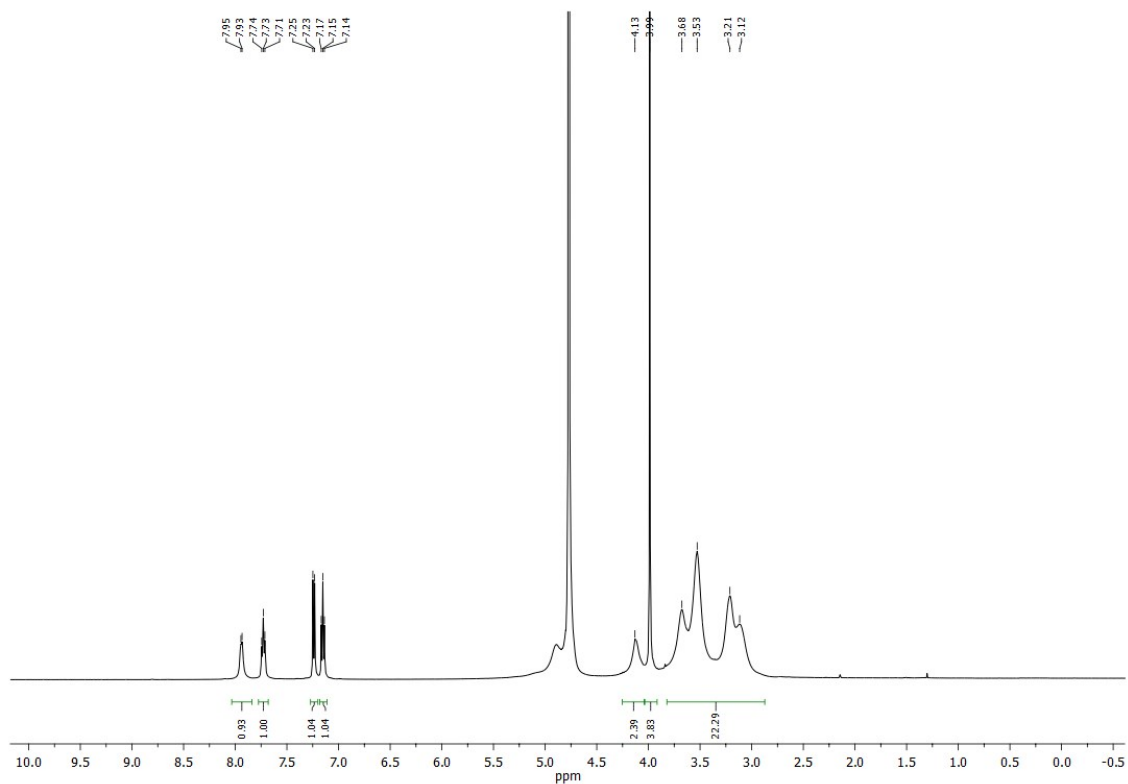

**Figure S21a.**  $^1\text{H}$  NMR spectrum of DO3A-oMAP

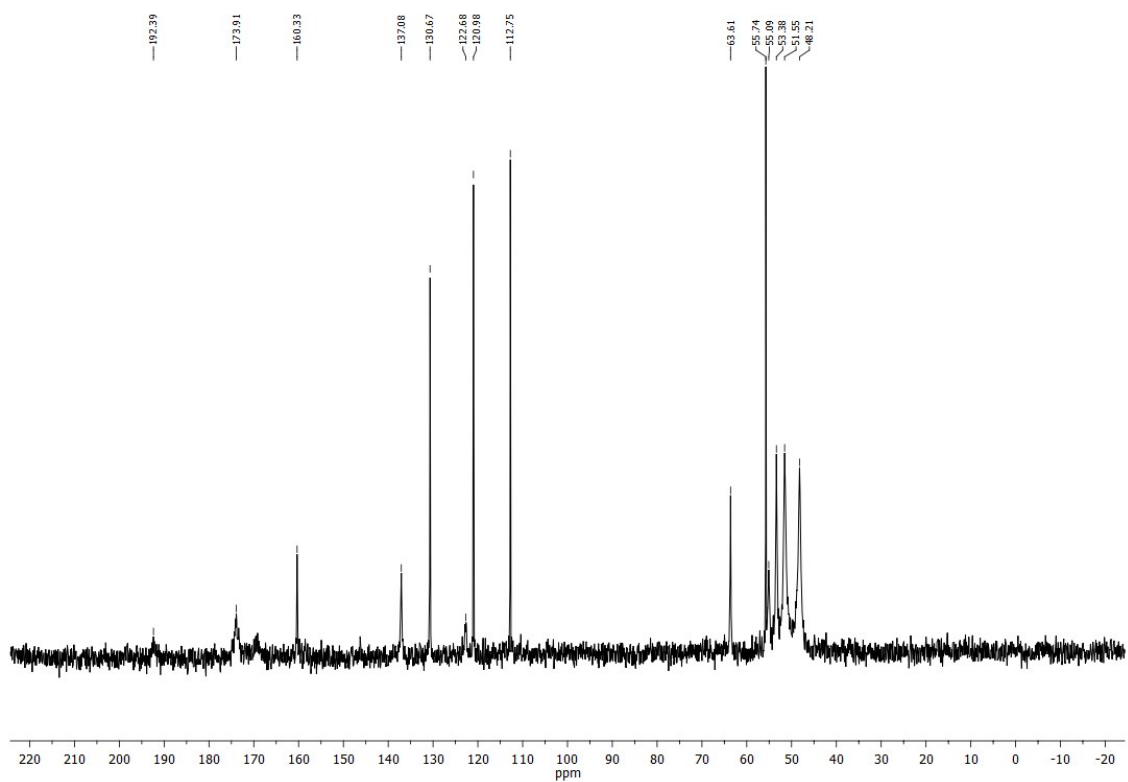

**Figure S21b.**  $^{13}\text{C}$  NMR spectrum of DO3A-oMAP

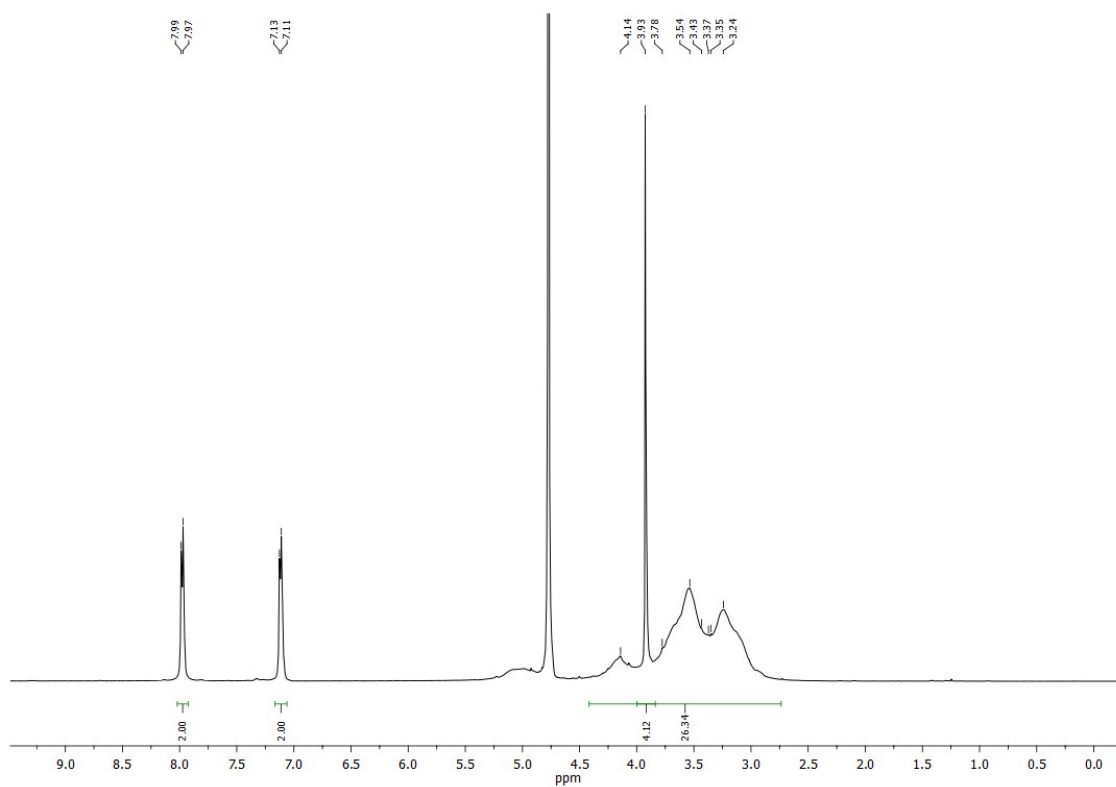

**Figure S22a.**  $^1\text{H}$  NMR spectrum of DO3A-pMAP

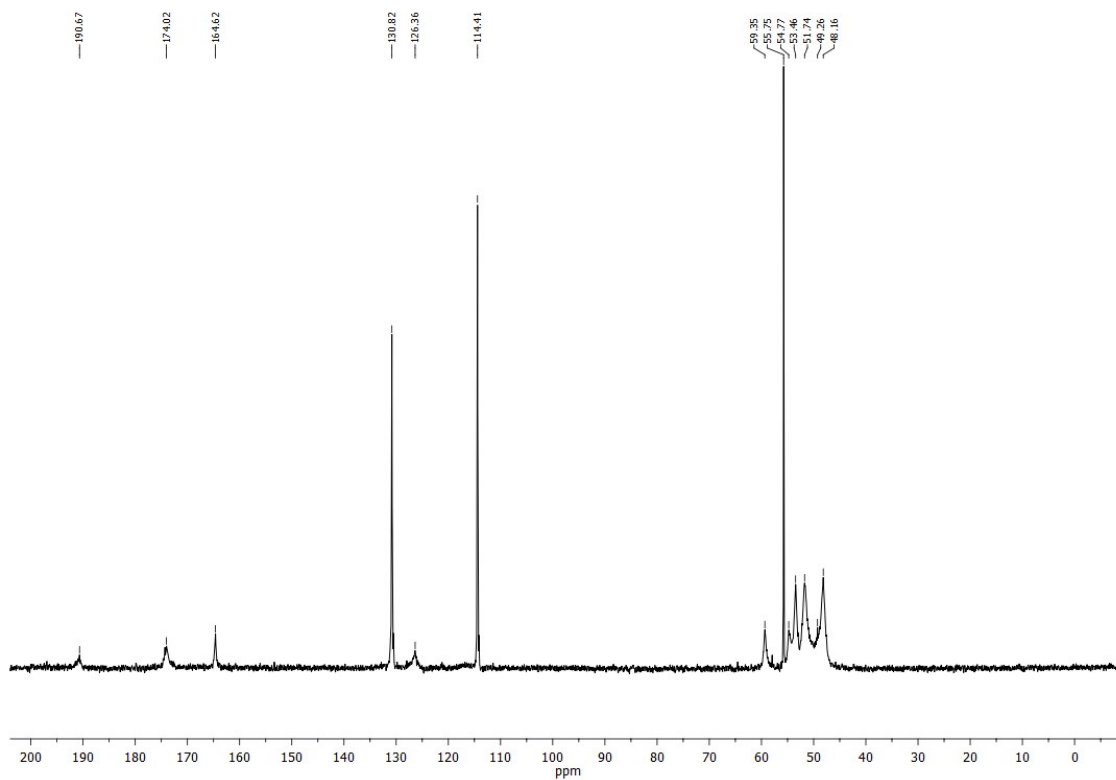

**Figure S22b.**  $^{13}\text{C}$  NMR spectrum of DO3A-pMAP

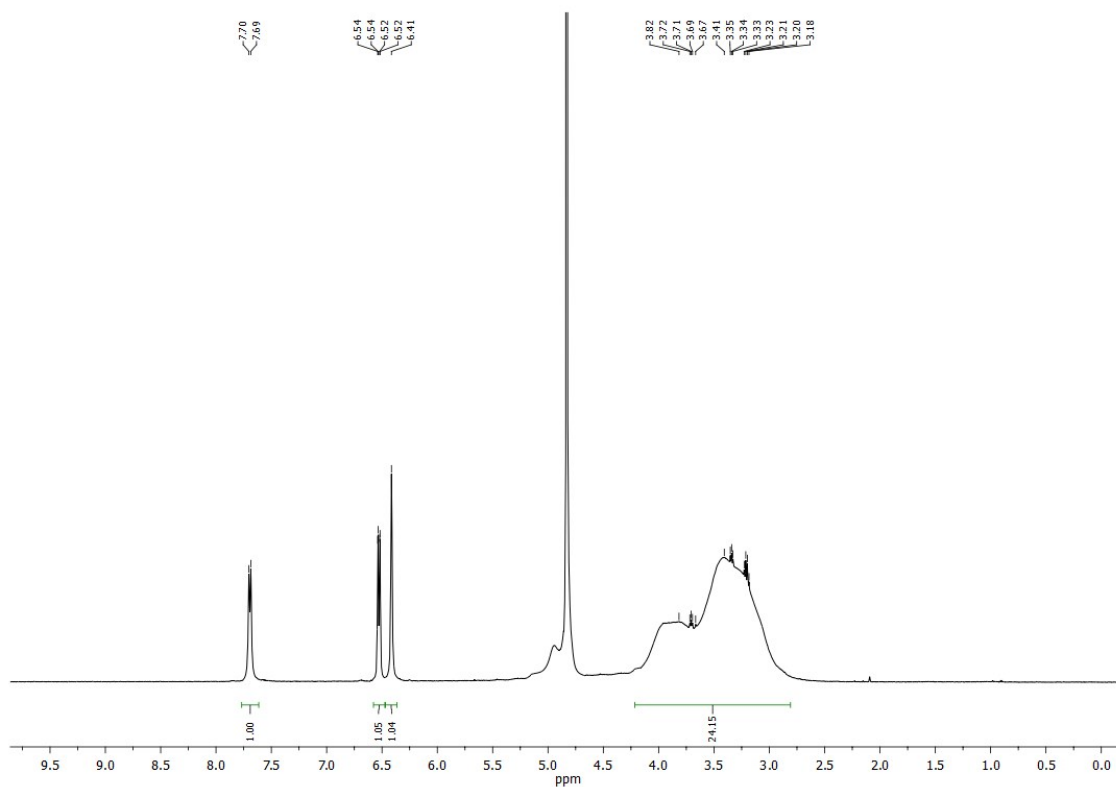

**Figure S23a.**  $^1\text{H}$  NMR spectrum of DO3A-DiHAP

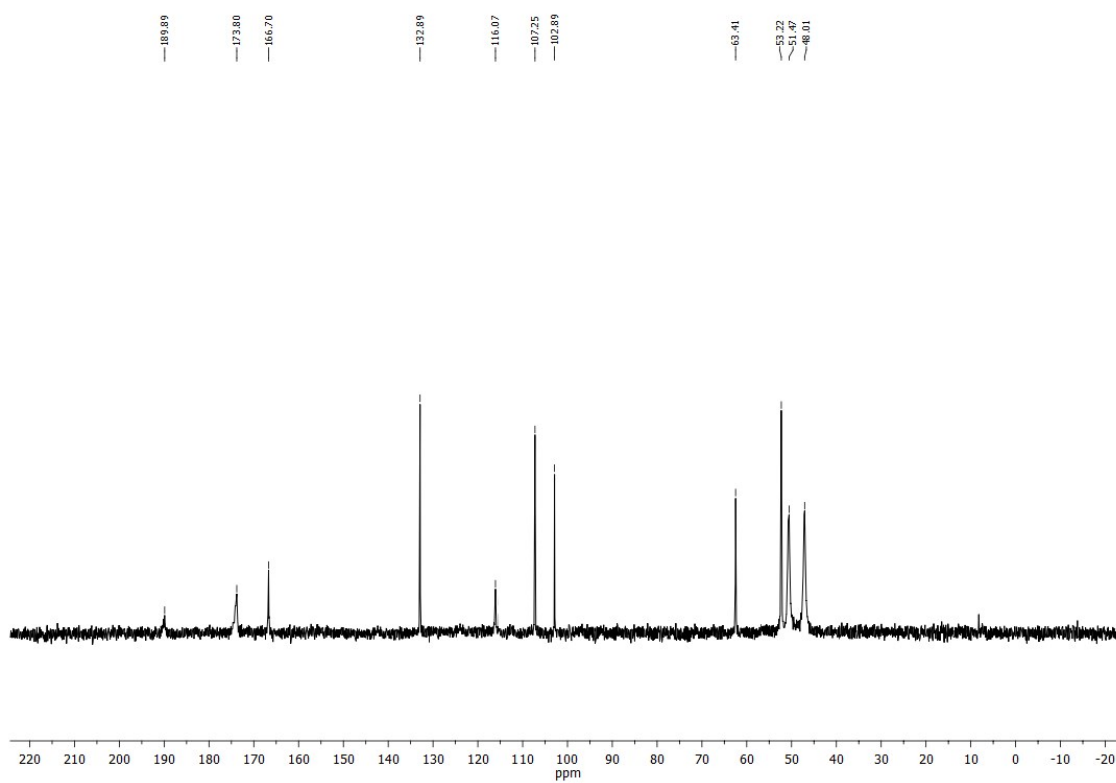

**Figure S23b.**  $^{13}\text{C}$  NMR spectrum of DO3A-DiHAP

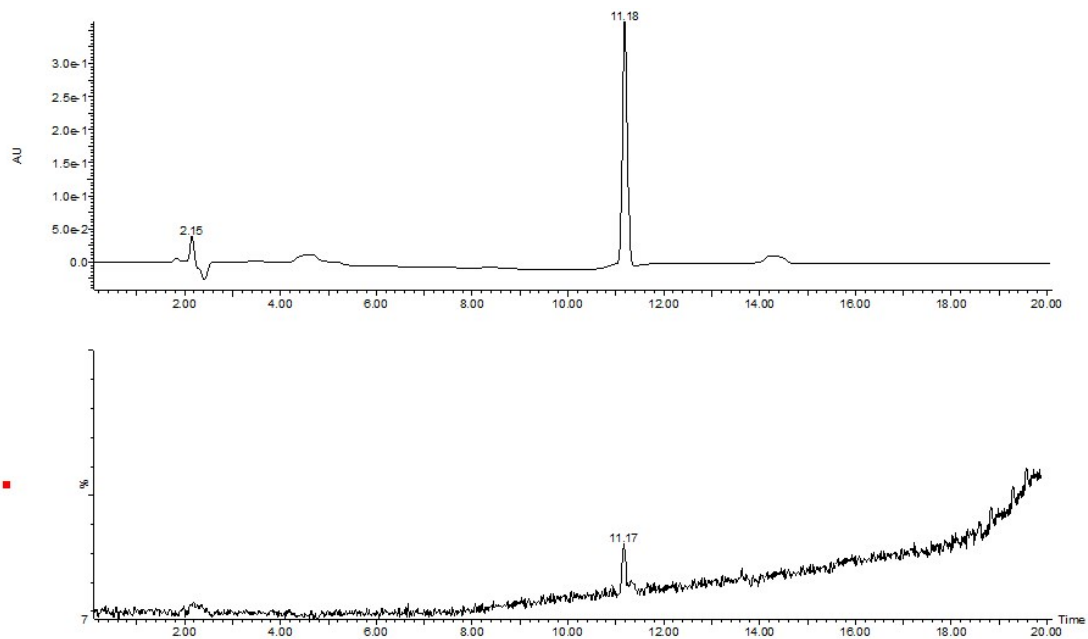

**Figure S24a.** HPLC-MS chromatogram of DO3A-oAnAP

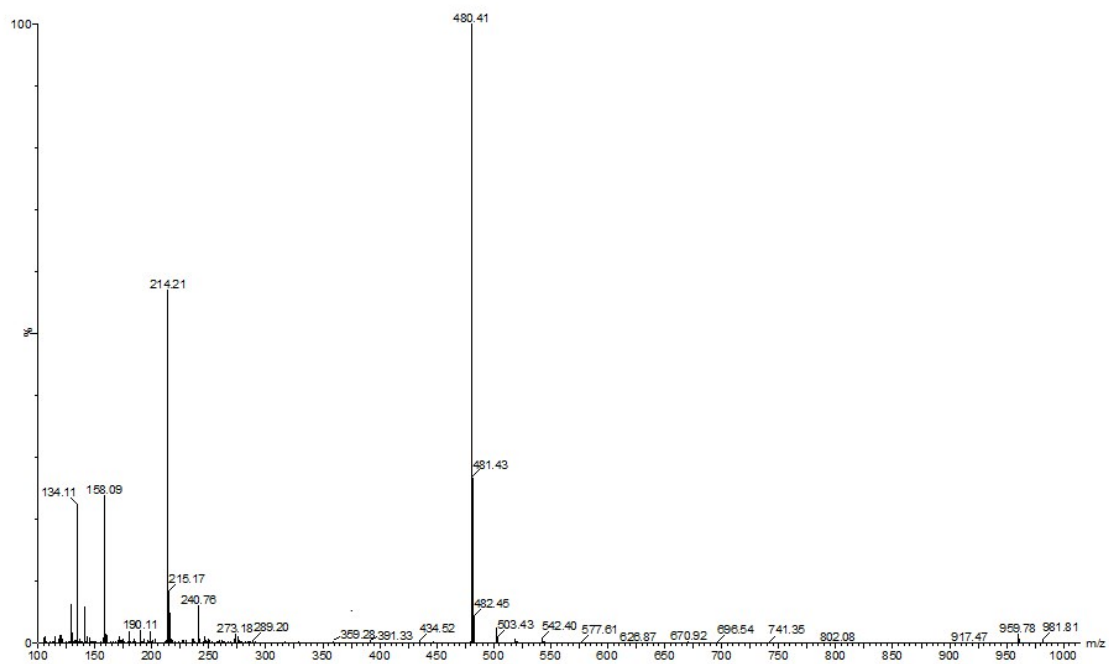

**Figure S24b.** MS spectrum of DO3A-oAnAP

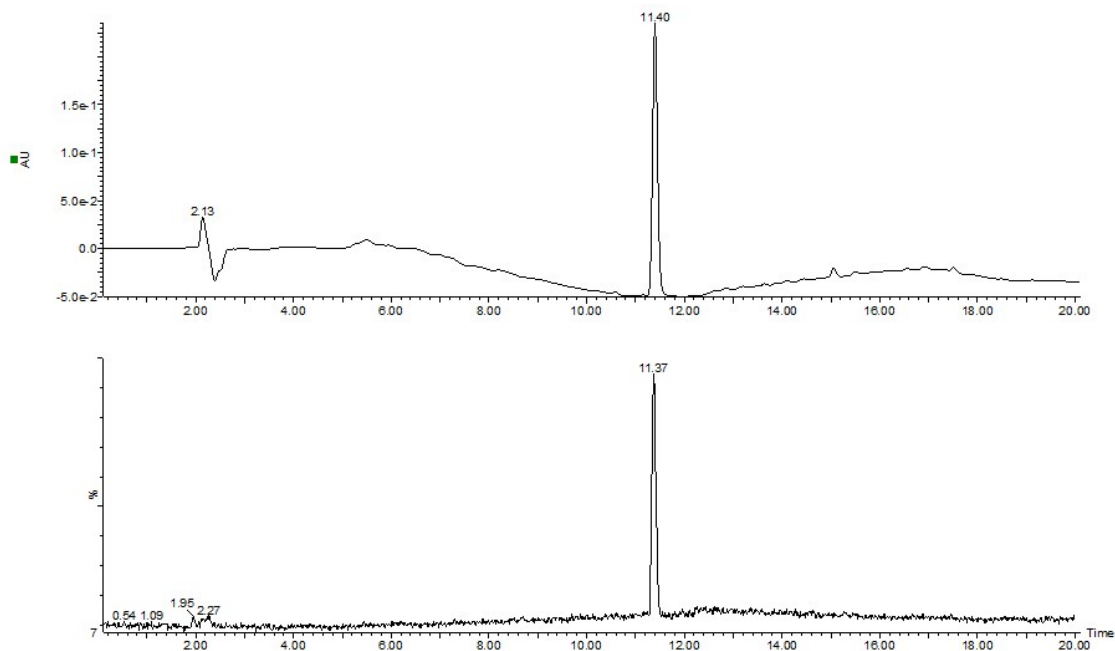

**Figure S25a.** HPLC-MS chromatogram of DO3A-oMAP

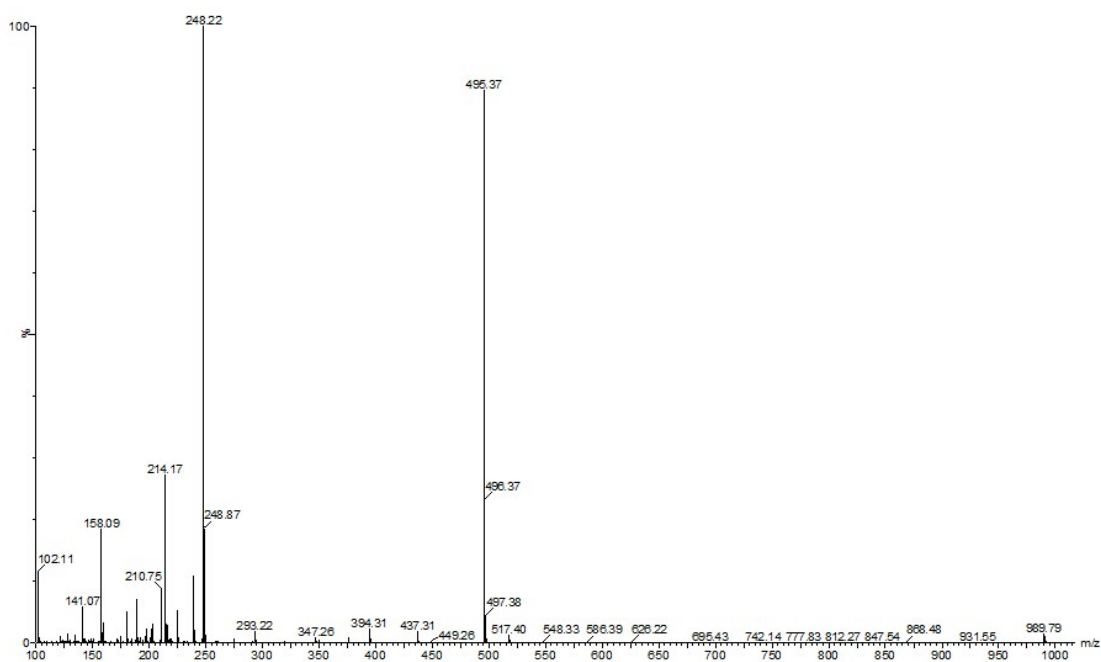

**Figure S25b.** MS spectrum of DO3A-oMAP

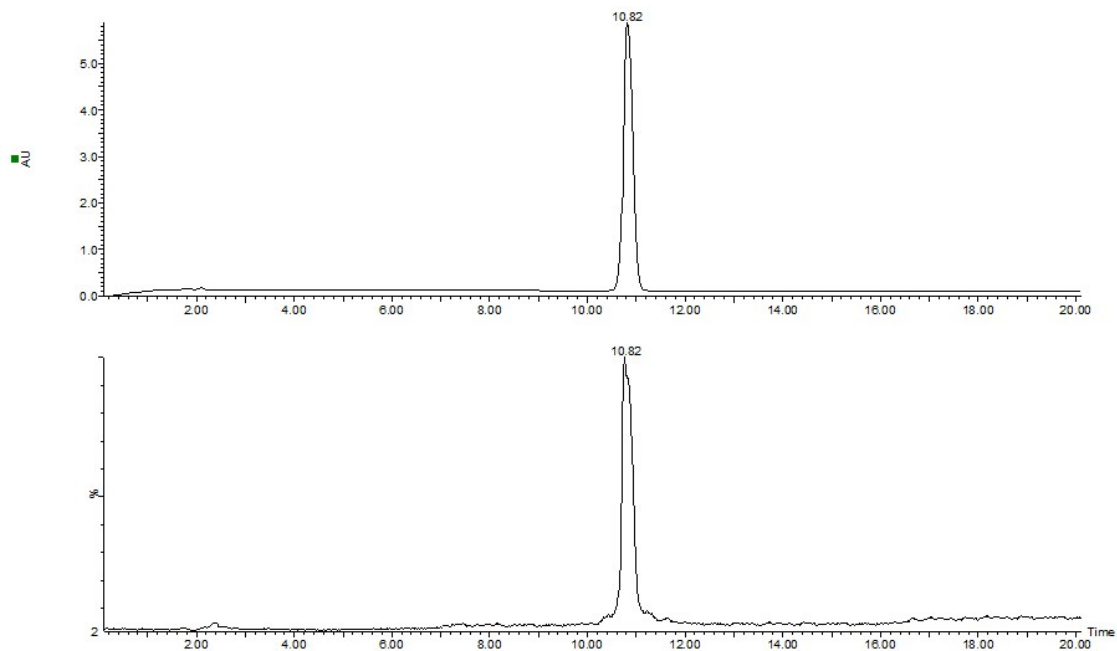

**Figure S26a. HPLC-MS chromatogram of DO3A-pMAP**

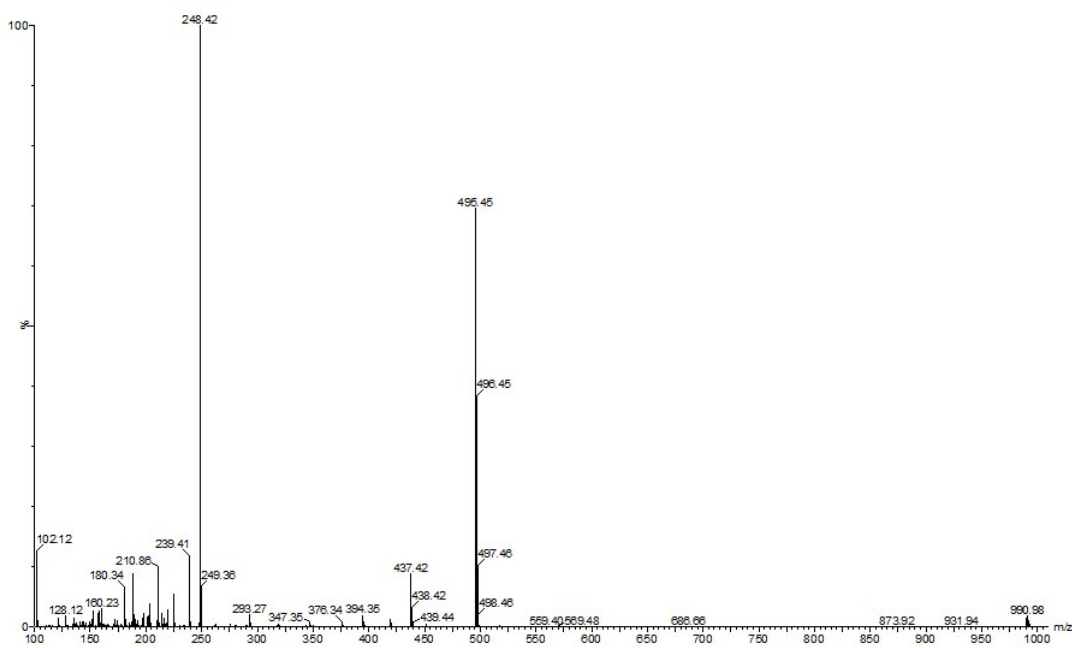

**Figure S26b. MS spectrum of DO3A-pMAP**

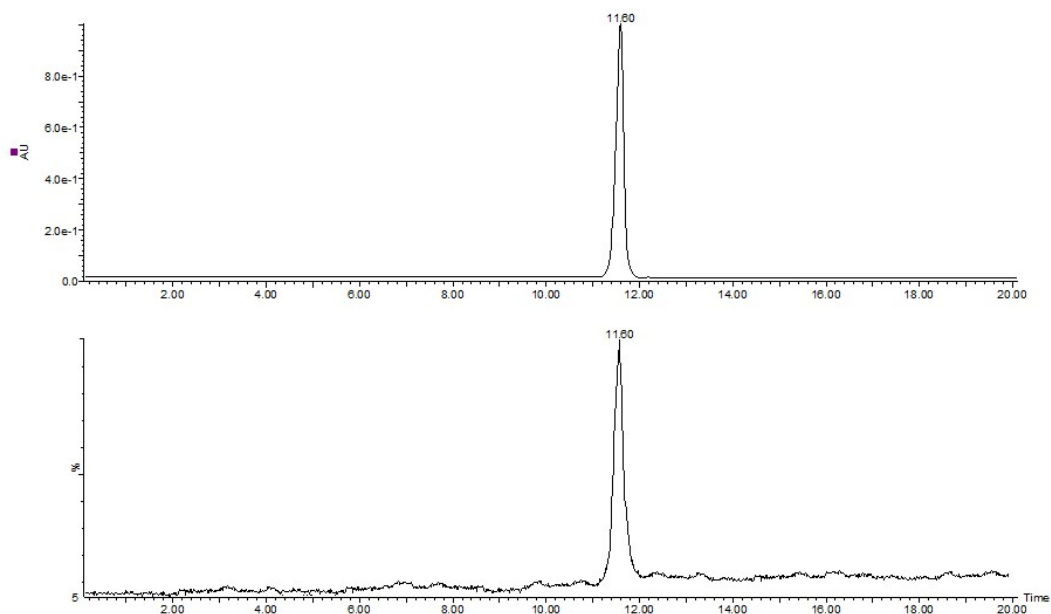

**Figure S27a.** HPLC-MS chromatogram of DO3A-DiHAP

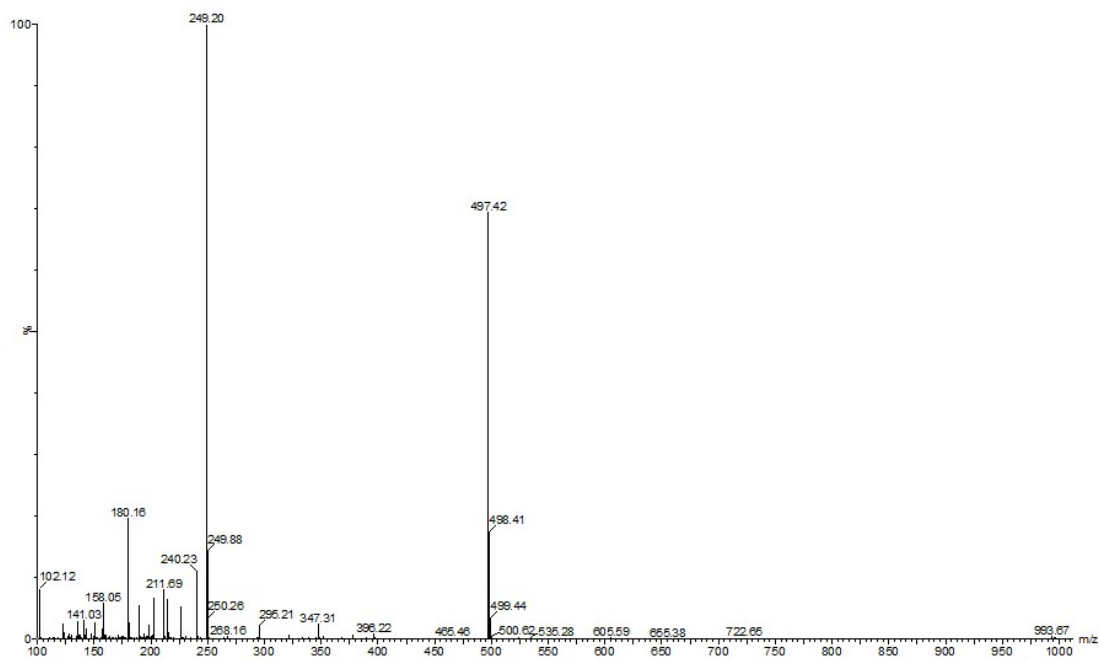

**Figure S27b.** MS spectrum of DO3A-DiHAP



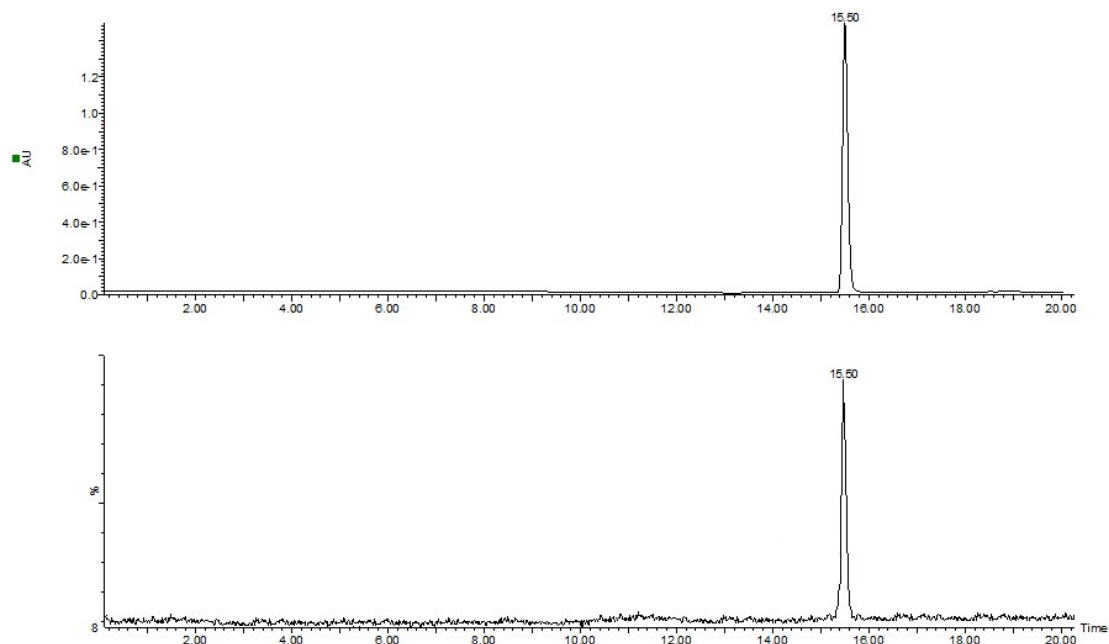

**Figure S28a.** HPLC-MS chromatogram of **GdDO3A-oAnAP**

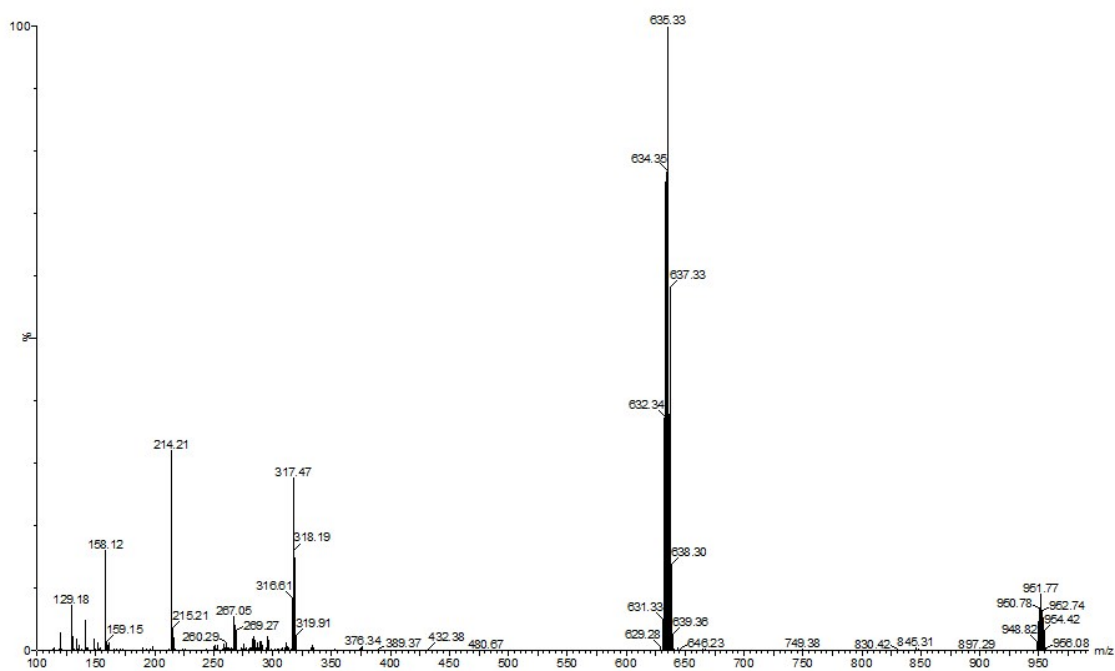

**Figure S28b.** MS spectrum of **GdDO3A-oAnAP**

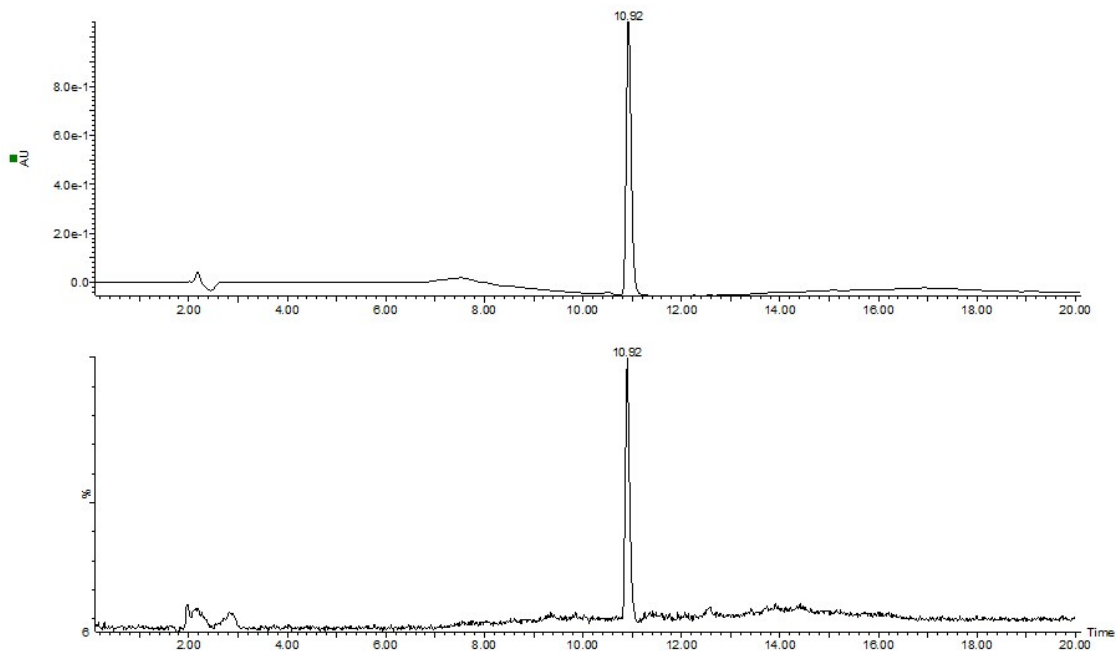

**Figure S29a.** HPLC-MS chromatogram of GdDO3A-oMAP

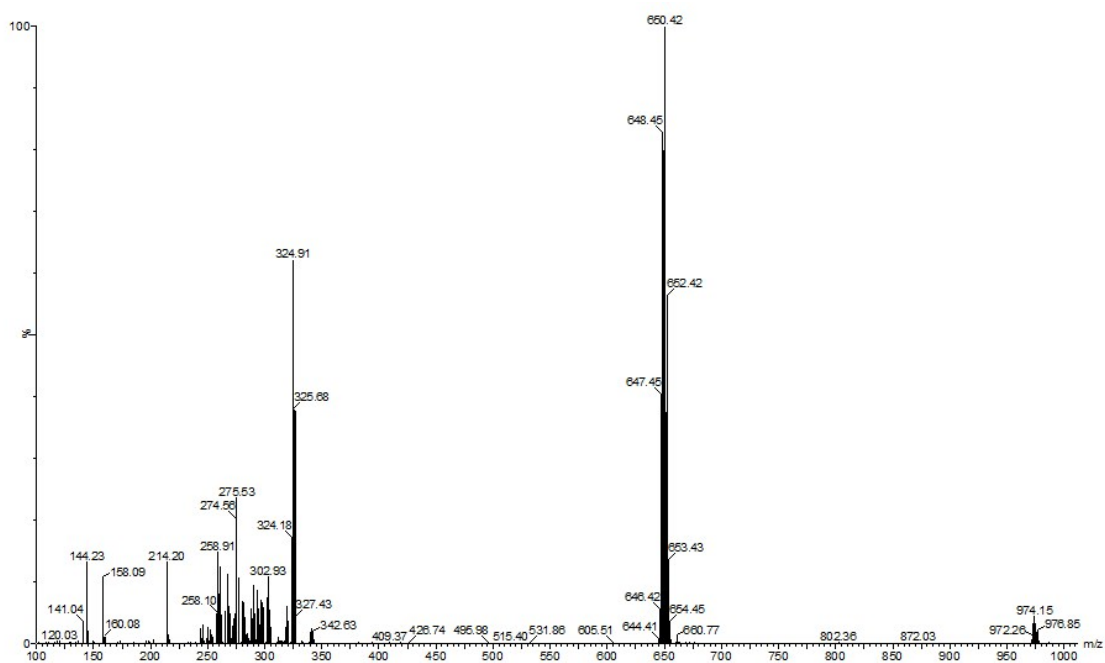

**Figure S29b.** MS spectrum of GdDO3A-oMAP

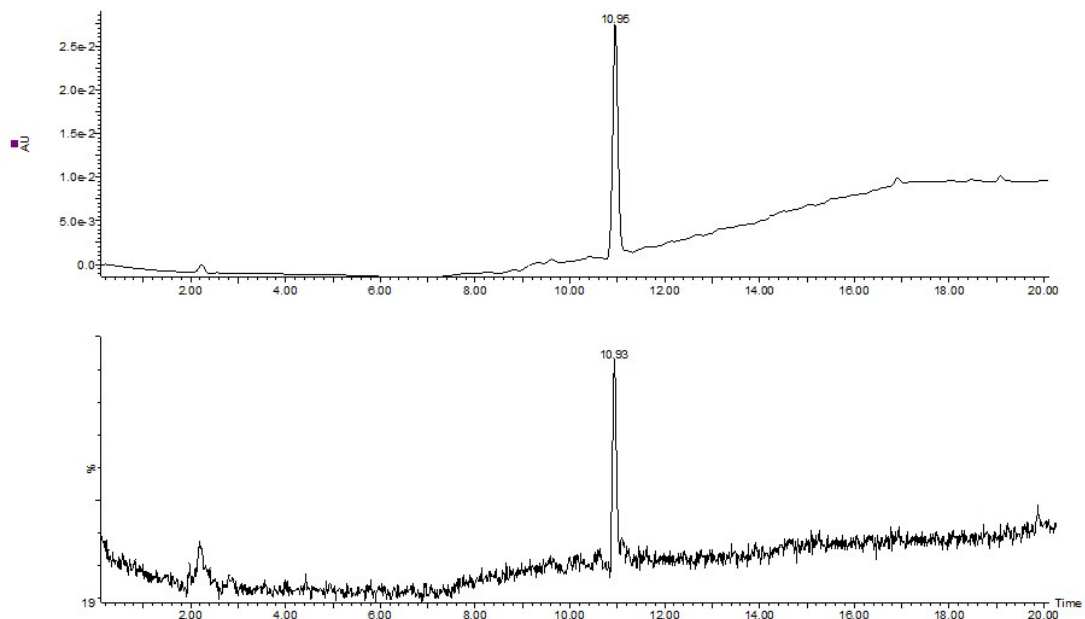

**Figure S30a.** HPLC-MS chromatogram of GdDO3A-pMAP

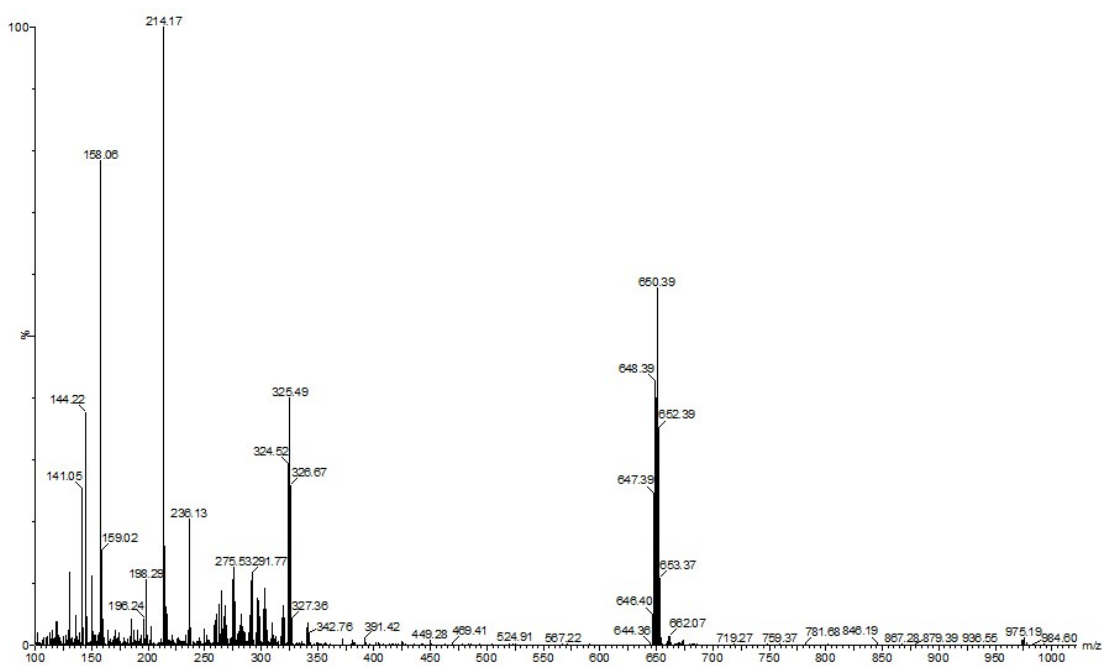

**Figure S30b.** MS spectrum of GdDO3A-pMAP

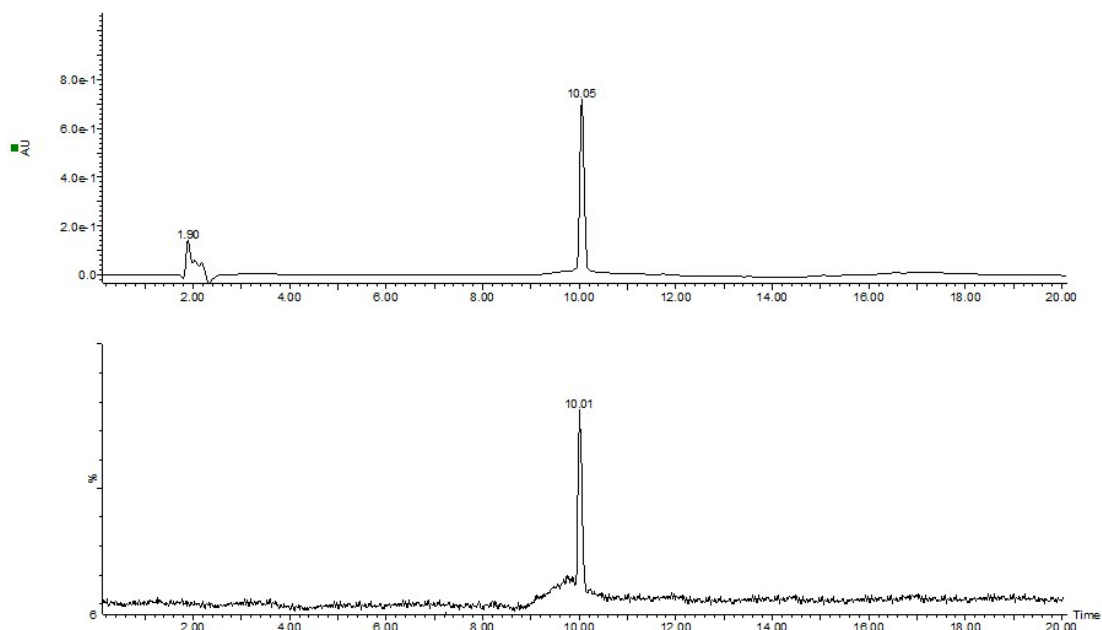

**Figure S31a.** HPLC-MS chromatogram of GdDO3A-DiHAP

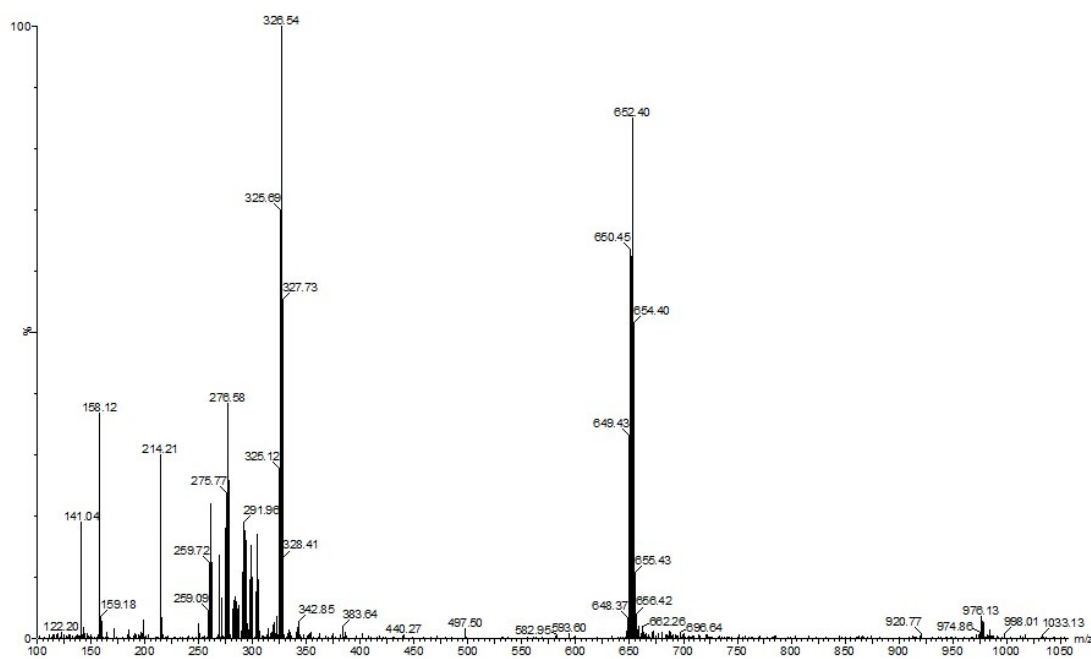

**Figure S31b.** MS spectrum of GdDO3A-DiHAP

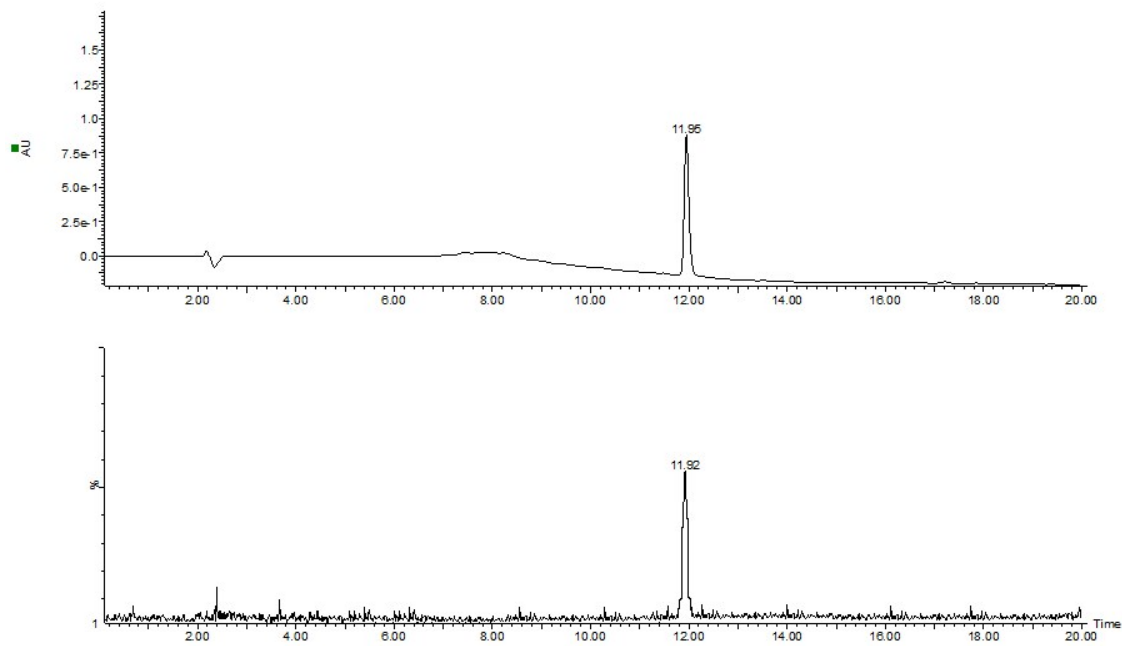

**Figure S32a.** HPLC-MS chromatogram of EuDO3A-oAnAP

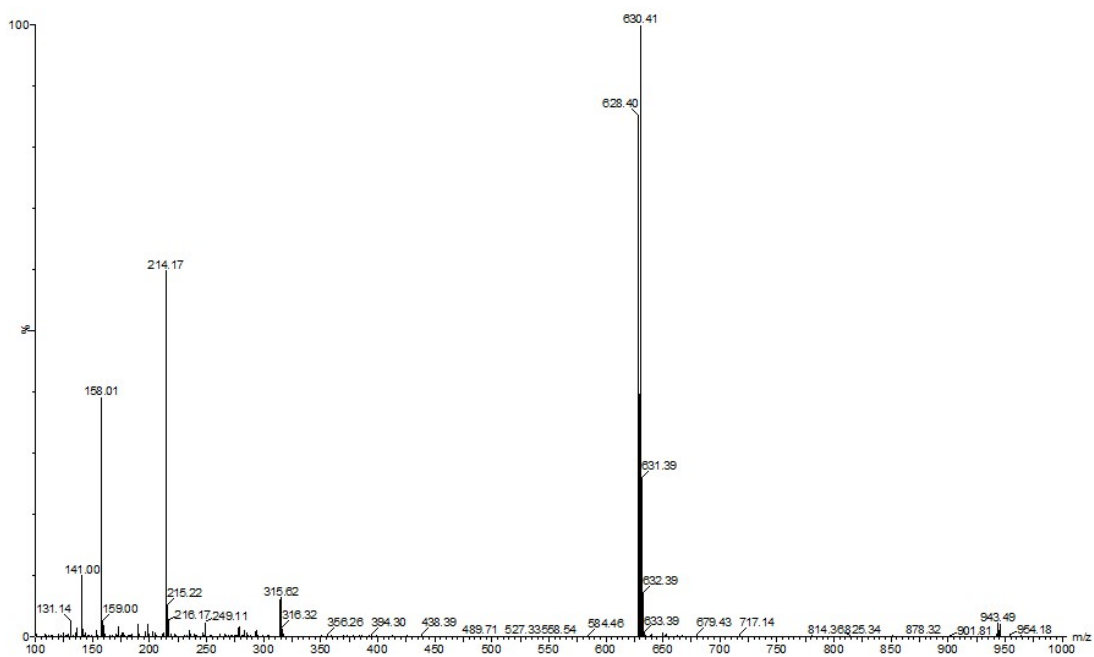

**Figure S32b.** MS spectrum of EuDO3A-oAnAP

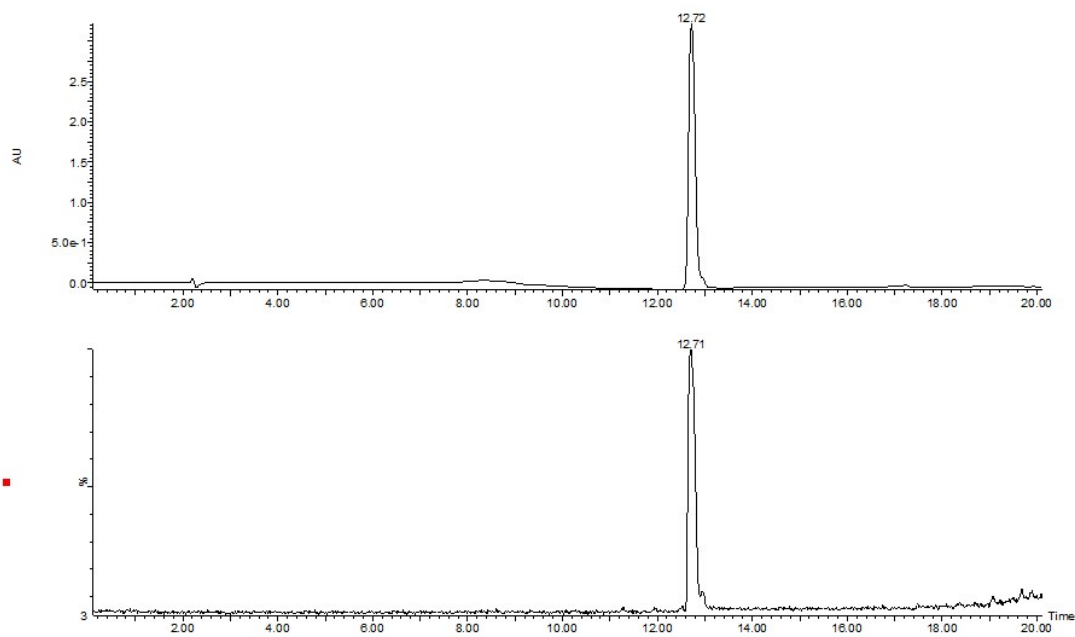

**Figure S33a.** HPLC-MS chromatogram of EuDO3A-oMAP

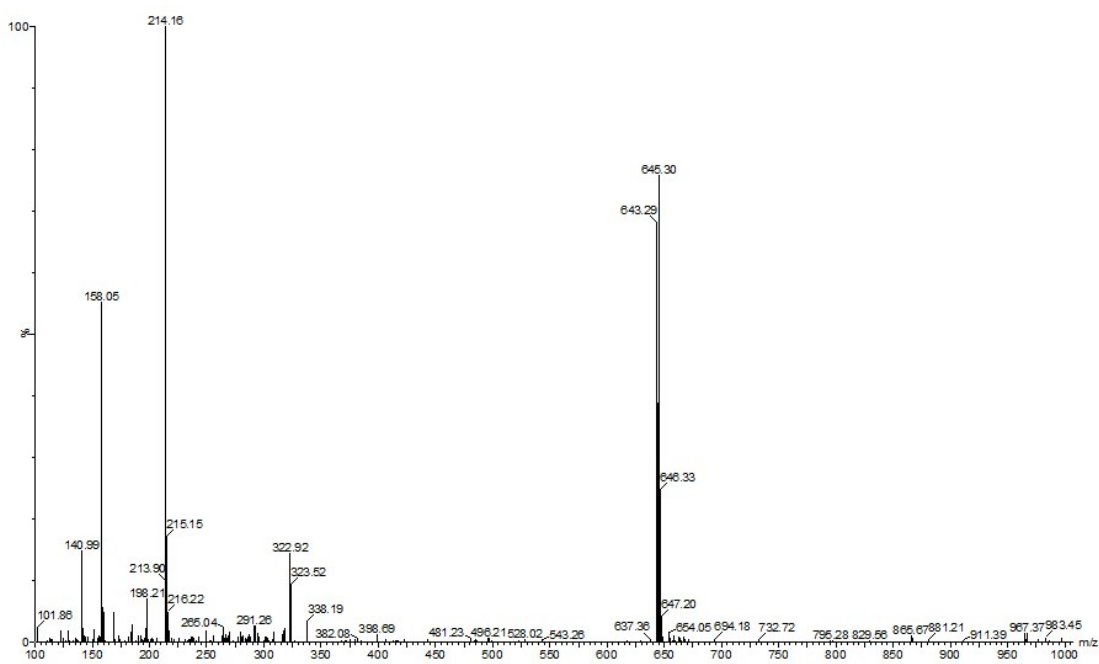

**Figure S33b.** MS spectrum of EuDO3A-oMAP

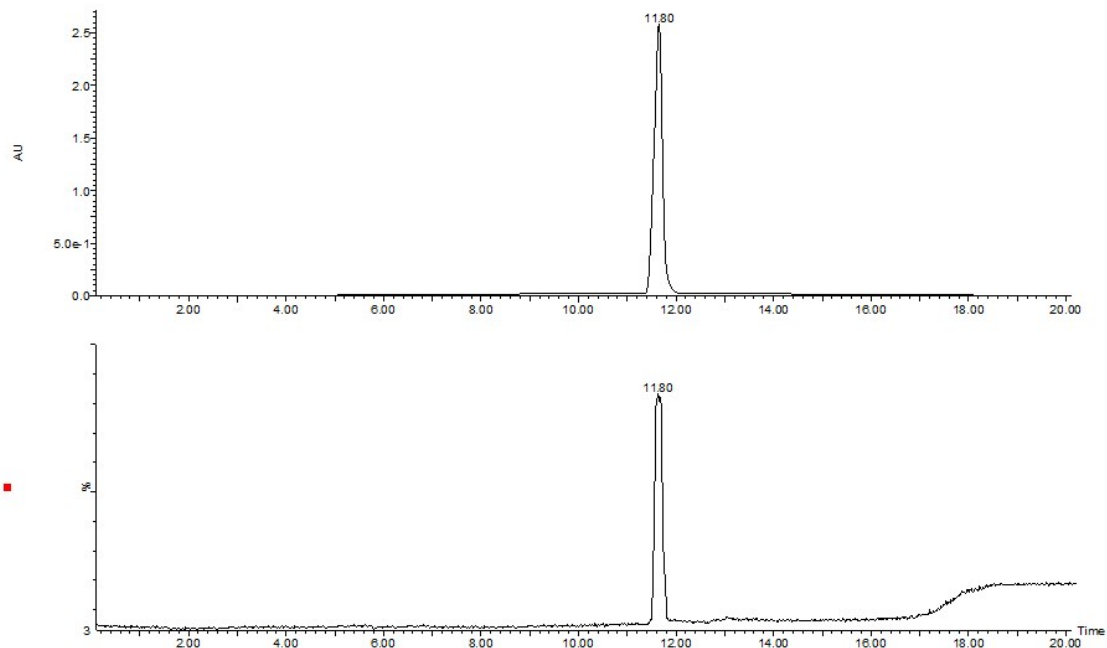

**Figure S34a.** HPLC-MS chromatogram of EuDO3A-pMAP

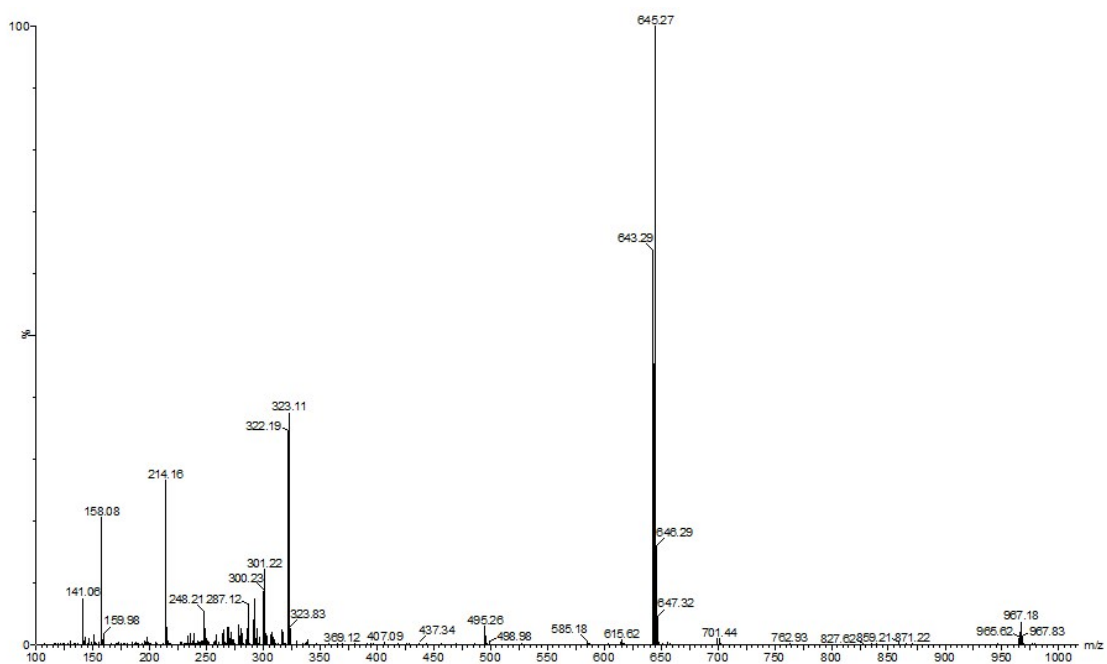

**Figure S34b.** MS spectrum of EuDO3A-pMAP

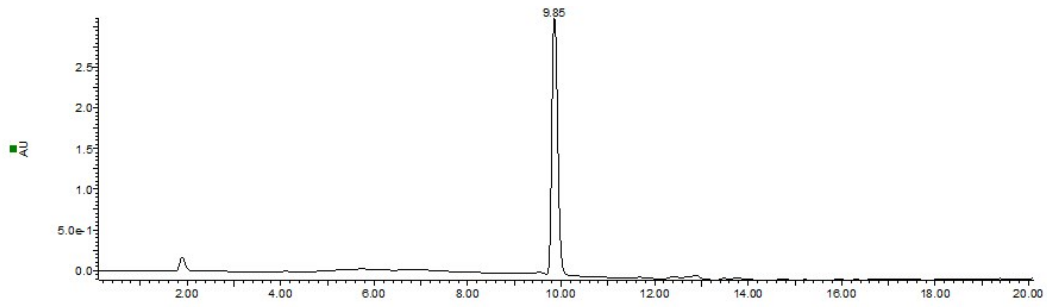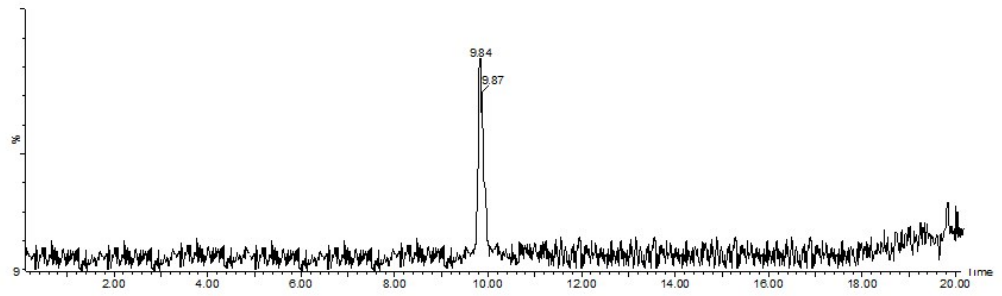

**Figure S35a. HPLC-MS chromatogram of EuDO3A-DiHAP**

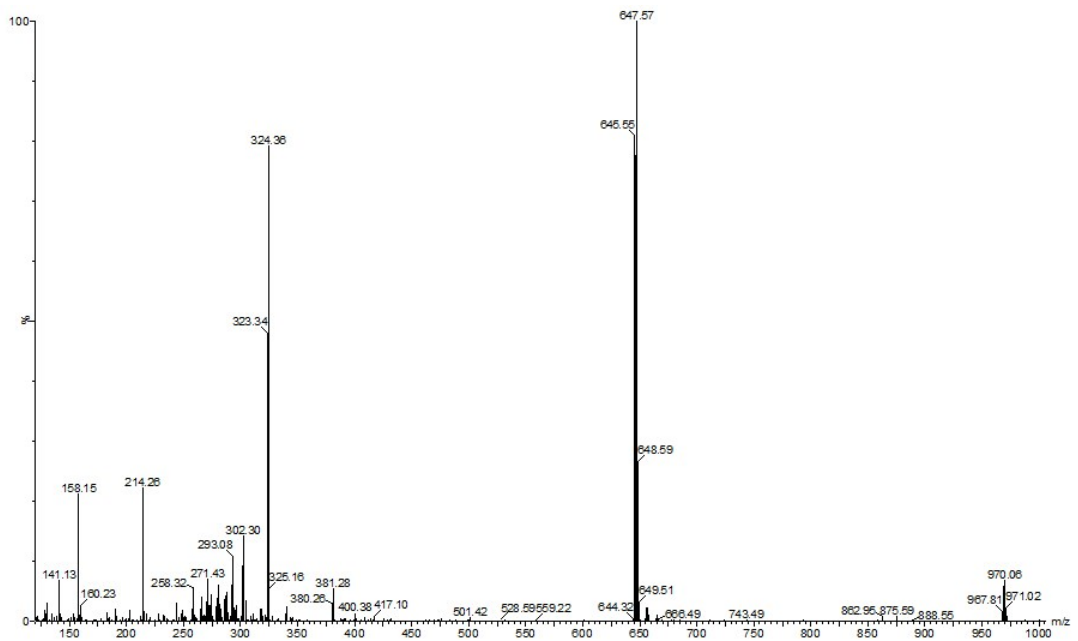

**Figure S35b. MS spectrum of EuDO3A-DiHAP**



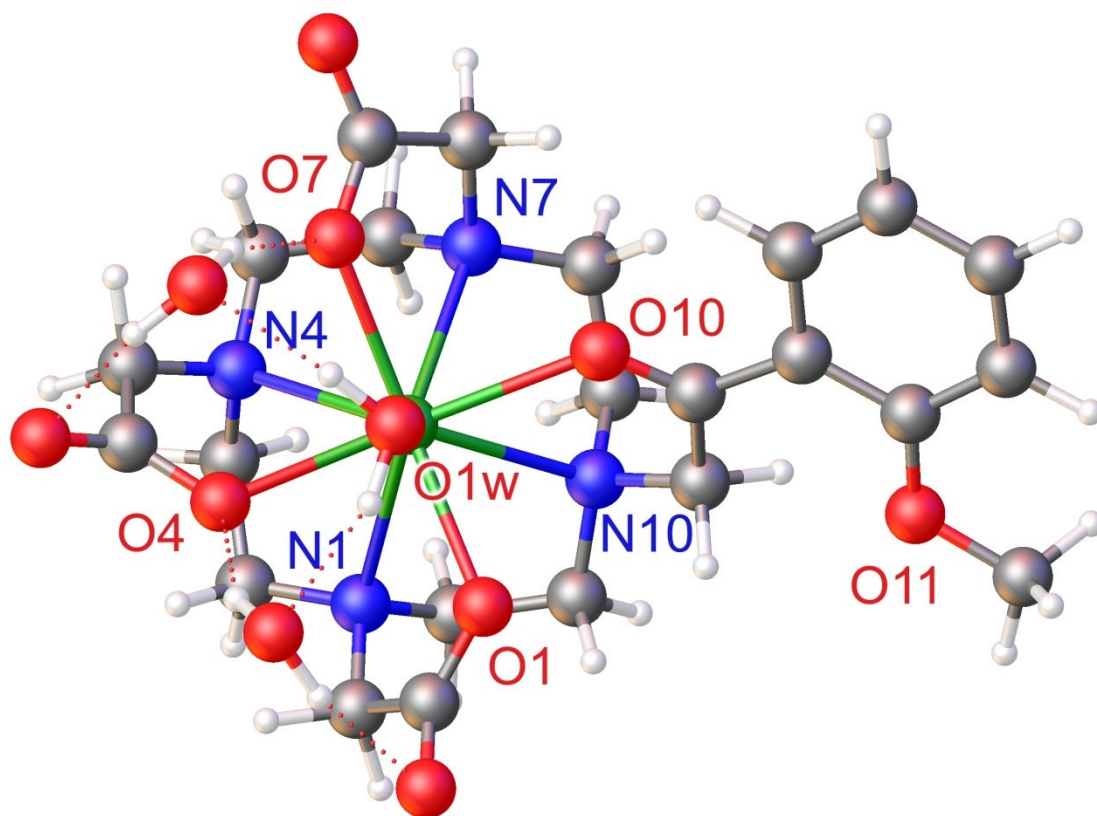

**Figure S36.** Structure of the GdDO3A-*o*MAP·3H<sub>2</sub>O complex obtained with DFT calculations.

**Table S1.** Energies of the <sup>7</sup>F<sub>1</sub> level (cm<sup>-1</sup>) observed in the emission spectra of EuDO3A-*p*HAP, EuDO3A-*o*HAP, EuDO3A-*o*AnAP, EuDO3A-*p*MAP and EuDO3A-*o*MAP.

| DO3A- <i>o</i> HAP | DO3A- <i>p</i> HAP | DO3A- <i>o</i> MAP | DO3A- <i>p</i> MAP | DO3A- <i>o</i> AnAP |
|--------------------|--------------------|--------------------|--------------------|---------------------|
| 296                | 270                | 273                | 273                | 264                 |
| 371                | 402                | 405                | 402                | <i>a</i>            |
| 473                | 467                | 467                | 470                | <i>a</i>            |

<sup>a</sup> Unresolved components due to poor resolution associated to weak emission.

**Table S2.** Bond distances (Å) of the metal coordination environments obtained with DFT calculations.<sup>a</sup>

|         | DO3A-<br><i>o</i> HAP | DO3A-<br><i>p</i> HAP | DO3A-<br><i>o</i> MAP | DO3A-<br><i>p</i> MAP | DO3A-<br><i>o</i> AnAP | DO3A-<br>DiHAP | DO3A-<br>AP |
|---------|-----------------------|-----------------------|-----------------------|-----------------------|------------------------|----------------|-------------|
| Gd1-N1  | 2.665                 | 2.674                 | 2.677                 | 2.692                 | 2.680                  | 2.670          | 2.673       |
| Gd1-N4  | 2.654                 | 2.690                 | 2.684                 | 2.695                 | 2.678                  | 2.666          | 2.667       |
| Gd1-N7  | 2.711                 | 2.704                 | 2.704                 | 2.696                 | 2.688                  | 2.707          | 2.690       |
| Gd1-N10 | 2.701                 | 2.718                 | 2.701                 | 2.714                 | 2.705                  | 2.701          | 2.714       |
| Gd1-O1  | 2.358                 | 2.363                 | 2.365                 | 2.364                 | 2.368                  | 2.360          | 2.366       |
| Gd1-O4  | 2.377                 | 2.387                 | 2.387                 | 2.363                 | 2.392                  | 2.379          | 2.385       |
| Gd1-O7  | 2.399                 | 2.383                 | 2.382                 | 2.382                 | 2.385                  | 2.398          | 2.381       |
| Gd1-O10 | 2.456                 | 2.461                 | 2.465                 | 2.492                 | 2.429                  | 2.443          | 2.481       |
| Gd1-O1w | 2.516                 | 2.518                 | 2.520                 | 2.493                 | 2.523                  | 2.518          | 2.516       |

<sup>a</sup> See Figure 5 and S43 for labelling.

**Table S3.** Optimized Cartesian coordinates (Å) obtained for the GdDO3A-AP·3H<sub>2</sub>O system (0 Imaginary Frequencies).

| Center<br>Number | Coordinates (Angstroms) |           |           |           |
|------------------|-------------------------|-----------|-----------|-----------|
|                  | X                       | Y         | Z         |           |
| 1                | 7                       | -1.762231 | -1.970112 | -1.133201 |
| 2                | 6                       | -3.096806 | -1.484252 | -1.549319 |
| 3                | 6                       | -3.064453 | -0.082514 | -2.135214 |
| 4                | 7                       | -2.550410 | 0.948320  | -1.206558 |
| 5                | 6                       | -2.126097 | 2.138628  | -1.977434 |
| 6                | 6                       | -0.778483 | 1.955440  | -2.656698 |
| 7                | 7                       | 0.340951  | 1.683856  | -1.726974 |
| 8                | 6                       | 1.482066  | 1.130390  | -2.486527 |
| 9                | 6                       | 1.303881  | -0.342558 | -2.820951 |
| 10               | 7                       | 1.134201  | -1.214411 | -1.638033 |
| 11               | 6                       | 0.516994  | -2.500113 | -2.042156 |
| 12               | 6                       | -0.975170 | -2.383868 | -2.311388 |
| 13               | 6                       | -1.898363 | -3.076630 | -0.168359 |
| 14               | 6                       | -0.831722 | -3.131944 | 0.931796  |
| 15               | 8                       | 0.031729  | -2.195001 | 0.956775  |
| 16               | 8                       | -0.930561 | -4.039084 | 1.759771  |
| 17               | 6                       | -3.561614 | 1.324802  | -0.200466 |
| 18               | 6                       | -3.524776 | 0.530856  | 1.109440  |
| 19               | 8                       | -4.328278 | 0.837677  | 1.985914  |
| 20               | 8                       | -2.608190 | -0.355909 | 1.222432  |
| 21               | 6                       | 0.739230  | 2.915282  | -1.022893 |
| 22               | 6                       | -0.158341 | 3.278654  | 0.165685  |

|    |    |           |           |           |
|----|----|-----------|-----------|-----------|
| 23 | 8  | -0.277709 | 4.449825  | 0.490179  |
| 24 | 8  | -0.691898 | 2.276382  | 0.773246  |
| 25 | 6  | 2.426463  | -1.465107 | -0.988645 |
| 26 | 6  | 2.823445  | -0.369081 | -0.021570 |
| 27 | 8  | 1.948638  | 0.333005  | 0.476264  |
| 28 | 1  | -2.840056 | -2.955529 | 0.368142  |
| 29 | 1  | -1.939879 | -4.049855 | -0.671653 |
| 30 | 1  | -4.577228 | 1.278385  | -0.610691 |
| 31 | 1  | -3.384558 | 2.358751  | 0.097923  |
| 32 | 1  | 0.798904  | 3.769342  | -1.706305 |
| 33 | 1  | 1.732782  | 2.758123  | -0.595040 |
| 34 | 1  | 2.342295  | -2.362507 | -0.366782 |
| 35 | 1  | 3.212422  | -1.646987 | -1.728547 |
| 36 | 1  | -3.740380 | -1.493546 | -0.671884 |
| 37 | 1  | -3.543720 | -2.161251 | -2.289194 |
| 38 | 1  | -4.078045 | 0.180452  | -2.465063 |
| 39 | 1  | -2.440803 | -0.073390 | -3.029324 |
| 40 | 1  | -2.868494 | 2.385364  | -2.747331 |
| 41 | 1  | -2.086484 | 2.989295  | -1.299500 |
| 42 | 1  | -0.562352 | 2.855017  | -3.248082 |
| 43 | 1  | -0.837834 | 1.129371  | -3.365005 |
| 44 | 1  | 1.628398  | 1.681690  | -3.424222 |
| 45 | 1  | 2.389771  | 1.280748  | -1.902700 |
| 46 | 1  | 0.426728  | -0.465980 | -3.454507 |
| 47 | 1  | 2.162860  | -0.674062 | -3.418852 |
| 48 | 1  | 0.686799  | -3.217759 | -1.241506 |
| 49 | 1  | 1.005480  | -2.894401 | -2.942353 |
| 50 | 1  | -1.152178 | -1.664147 | -3.110862 |
| 51 | 1  | -1.333099 | -3.352358 | -2.685579 |
| 52 | 8  | -1.888540 | 2.241610  | 3.209386  |
| 53 | 1  | -1.579520 | 2.500127  | 2.318990  |
| 54 | 1  | -0.663602 | 0.895611  | 3.009839  |
| 55 | 64 | -0.489017 | -0.021068 | 0.180736  |
| 56 | 8  | -0.132644 | 0.149417  | 2.665364  |
| 57 | 1  | -0.547930 | -0.637867 | 3.071134  |
| 58 | 6  | 4.235365  | -0.165767 | 0.347392  |
| 59 | 6  | 5.248067  | -1.041925 | -0.056962 |
| 60 | 6  | 4.554639  | 0.947971  | 1.133536  |
| 61 | 6  | 6.560645  | -0.805333 | 0.324532  |
| 62 | 6  | 5.867872  | 1.187074  | 1.500019  |
| 63 | 6  | 6.870882  | 0.309242  | 1.096365  |
| 64 | 1  | 7.342306  | -1.488586 | 0.016346  |
| 65 | 1  | 6.113156  | 2.054774  | 2.100123  |
| 66 | 1  | -2.760510 | 1.854716  | 3.060479  |
| 67 | 8  | -1.888962 | -1.817668 | 3.487494  |
| 68 | 1  | -1.610273 | -2.675857 | 3.139798  |
| 69 | 1  | -2.372768 | -1.399021 | 2.752164  |
| 70 | 1  | 3.762562  | 1.619007  | 1.441526  |
| 71 | 1  | 7.898869  | 0.495475  | 1.384824  |
| 72 | 1  | 5.024874  | -1.915863 | -0.655739 |

-----  
E(RwB97XD) = -1866.9753619 Hartree  
Zero-point correction = 0.597500  
Thermal correction to Energy = 0.634516  
Thermal correction to Enthalpy = 0.635461  
Thermal correction to Gibbs Free Energy = 0.531105  
Sum of electronic and zero-point Energies = -1866.377861  
Sum of electronic and thermal Energies = -1866.340845  
Sum of electronic and thermal Enthalpies = -1866.339901

Sum of electronic and thermal Free Energies= -1866.444257

**Table S4.** Optimized Cartesian coordinates (Å) obtained for the GdDO3A-AP·3H<sub>2</sub>O system (1 Imaginary Frequency).

| Center<br>Number |   | Coordinates (Angstroms) |           |           |
|------------------|---|-------------------------|-----------|-----------|
|                  |   | X                       | Y         | Z         |
| 1                | 7 | -1.613553               | -1.999083 | -1.209733 |
| 2                | 6 | -3.017783               | -1.634174 | -1.509040 |
| 3                | 6 | -3.161338               | -0.211867 | -2.023835 |
| 4                | 7 | -2.695572               | 0.815598  | -1.067958 |
| 5                | 6 | -2.441563               | 2.087982  | -1.782606 |
| 6                | 6 | -1.129537               | 2.087854  | -2.553118 |
| 7                | 7 | 0.068758                | 1.863780  | -1.710665 |
| 8                | 6 | 1.211086                | 1.467717  | -2.565497 |
| 9                | 6 | 1.146048                | 0.009620  | -2.994234 |
| 10               | 7 | 1.147980                | -0.946151 | -1.862763 |
| 11               | 6 | 0.625908                | -2.263183 | -2.303307 |
| 12               | 6 | -0.883990               | -2.280027 | -2.462850 |
| 13               | 6 | -1.566538               | -3.155469 | -0.292196 |
| 14               | 6 | -0.439824               | -3.139427 | 0.749585  |
| 15               | 8 | 0.319131                | -2.112234 | 0.778130  |
| 16               | 8 | -0.388661               | -4.088811 | 1.529471  |
| 17               | 6 | -3.664447               | 1.019271  | 0.024546  |
| 18               | 6 | -3.449679               | 0.160548  | 1.274433  |
| 19               | 8 | -4.245359               | 0.287067  | 2.198700  |
| 20               | 8 | -2.406075               | -0.586705 | 1.294872  |
| 21               | 6 | 0.397401                | 3.078021  | -0.940205 |
| 22               | 6 | -0.443105               | 3.267370  | 0.328379  |
| 23               | 8 | -0.651215               | 4.393376  | 0.747851  |
| 24               | 8 | -0.833860               | 2.174192  | 0.891969  |
| 25               | 6 | 2.502262                | -1.114671 | -1.318938 |
| 26               | 6 | 2.846661                | -0.128871 | -0.225712 |
| 27               | 8 | 1.950685                | 0.525599  | 0.301367  |
| 28               | 1 | -2.484593               | -3.169532 | 0.296056  |
| 29               | 1 | -1.525706               | -4.102490 | -0.841914 |
| 30               | 1 | -4.696261               | 0.886477  | -0.319788 |
| 31               | 1 | -3.576440               | 2.047134  | 0.379194  |
| 32               | 1 | 0.328026                | 3.978214  | -1.559687 |
| 33               | 1 | 1.428836                | 2.990606  | -0.589292 |
| 34               | 1 | 2.574024                | -2.095450 | -0.839080 |
| 35               | 1 | 3.256132                | -1.090133 | -2.113266 |
| 36               | 1 | -3.592517               | -1.746725 | -0.591544 |
| 37               | 1 | -3.447498               | -2.320861 | -2.249245 |
| 38               | 1 | -4.213749               | -0.037088 | -2.282102 |
| 39               | 1 | -2.595861               | -0.094498 | -2.948358 |
| 40               | 1 | -3.254095               | 2.304294  | -2.487636 |
| 41               | 1 | -2.439917               | 2.895028  | -1.051818 |
| 42               | 1 | -1.038797               | 3.044858  | -3.082962 |
| 43               | 1 | -1.154444               | 1.313348  | -3.319838 |
| 44               | 1 | 1.257016                | 2.093218  | -3.465507 |
| 45               | 1 | 2.131510                | 1.654663  | -2.012786 |
| 46               | 1 | 0.239627                | -0.160340 | -3.573989 |
| 47               | 1 | 1.986359                | -0.197179 | -3.668770 |
| 48               | 1 | 0.917329                | -3.002557 | -1.558778 |

|    |    |           |           |           |
|----|----|-----------|-----------|-----------|
| 49 | 1  | 1.084830  | -2.560063 | -3.254377 |
| 50 | 1  | -1.188506 | -1.545738 | -3.208442 |
| 51 | 1  | -1.177518 | -3.260567 | -2.859842 |
| 52 | 8  | -2.018025 | 2.017562  | 3.376624  |
| 53 | 1  | -1.681153 | 2.226479  | 2.483964  |
| 54 | 1  | -0.665236 | 0.744191  | 3.580966  |
| 55 | 64 | -0.453279 | -0.011399 | 0.086974  |
| 56 | 8  | 0.024712  | 0.061352  | 3.524315  |
| 57 | 1  | -0.470171 | -0.773065 | 3.581206  |
| 58 | 6  | 4.236924  | 0.003769  | 0.239914  |
| 59 | 6  | 5.269600  | -0.797351 | -0.259919 |
| 60 | 6  | 4.511850  | 0.949771  | 1.234656  |
| 61 | 6  | 6.557473  | -0.653615 | 0.234099  |
| 62 | 6  | 5.800736  | 1.095137  | 1.718062  |
| 63 | 6  | 6.823110  | 0.291988  | 1.218899  |
| 64 | 1  | 7.354070  | -1.279111 | -0.149196 |
| 65 | 1  | 6.011395  | 1.829904  | 2.485421  |
| 66 | 1  | -2.828526 | 1.517709  | 3.222773  |
| 67 | 8  | -1.692812 | -2.189387 | 3.446579  |
| 68 | 1  | -1.249141 | -2.930061 | 3.013446  |
| 69 | 1  | -2.105496 | -1.691581 | 2.716832  |
| 70 | 1  | 3.704575  | 1.561957  | 1.616540  |
| 71 | 1  | 7.831350  | 0.403060  | 1.600652  |
| 72 | 1  | 5.081438  | -1.542018 | -1.023040 |

-----  
E(RwB97XD) = -1866.9641052 Hartree

Zero-point correction = 0.597574

Thermal correction to Energy = 0.634273

Thermal correction to Enthalpy = 0.635217

Thermal correction to Gibbs Free Energy = 0.530565

Sum of electronic and zero-point Energies = -1866.366531

Sum of electronic and thermal Energies = -1866.329833

Sum of electronic and thermal Enthalpies = -1866.328889

Sum of electronic and thermal Free Energies = -1866.433541

**Table S5.** Optimized Cartesian coordinates (Å) obtained for the GdDO3A-*o*HAP·4H<sub>2</sub>O system (0 Imaginary Frequencies).

| Center Number |   | Coordinates (Angstroms) |           |           |
|---------------|---|-------------------------|-----------|-----------|
|               |   | X                       | Y         | Z         |
| 1             | 7 | 2.505121                | -1.966729 | 0.738511  |
| 2             | 6 | 3.763804                | -1.342587 | 1.204296  |
| 3             | 6 | 3.534396                | -0.095310 | 2.040724  |
| 4             | 7 | 2.822970                | 0.983215  | 1.322596  |
| 5             | 6 | 2.248980                | 1.940008  | 2.295615  |
| 6             | 6 | 1.000474                | 1.412306  | 2.981199  |
| 7             | 7 | -0.125055               | 1.132609  | 2.061691  |
| 8             | 6 | -1.109448               | 0.263450  | 2.741839  |
| 9             | 6 | -0.677806               | -1.192426 | 2.788077  |
| 10            | 7 | -0.438189               | -1.788157 | 1.455515  |
| 11            | 6 | 0.388925                | -3.011418 | 1.591713  |
| 12            | 6 | 1.858174                | -2.707352 | 1.838758  |
| 13            | 6 | 2.767080                | -2.846299 | -0.415623 |
| 14            | 6 | 1.674700                | -2.868063 | -1.490606 |
| 15            | 8 | 0.667303                | -2.106771 | -1.314848 |

|    |    |           |           |           |
|----|----|-----------|-----------|-----------|
| 16 | 8  | 1.880712  | -3.566018 | -2.484471 |
| 17 | 6  | 3.712630  | 1.686570  | 0.377881  |
| 18 | 6  | 3.692829  | 1.173197  | -1.065949 |
| 19 | 8  | 4.356968  | 1.784348  | -1.898619 |
| 20 | 8  | 2.931104  | 0.174303  | -1.315686 |
| 21 | 6  | -0.769247 | 2.382780  | 1.624111  |
| 22 | 6  | -0.206090 | 3.008622  | 0.346382  |
| 23 | 8  | -0.645460 | 4.105430  | 0.005145  |
| 24 | 8  | 0.656230  | 2.324976  | -0.304817 |
| 25 | 6  | -1.711871 | -2.126323 | 0.802841  |
| 26 | 6  | -2.344888 | -0.941442 | 0.103889  |
| 27 | 8  | -1.572341 | -0.053543 | -0.317635 |
| 28 | 1  | 3.656828  | -2.486006 | -0.932783 |
| 29 | 1  | 2.975760  | -3.875272 | -0.100183 |
| 30 | 1  | 4.750571  | 1.692962  | 0.730815  |
| 31 | 1  | 3.395890  | 2.727616  | 0.309374  |
| 32 | 1  | -0.751583 | 3.143251  | 2.413690  |
| 33 | 1  | -1.822635 | 2.193770  | 1.408362  |
| 34 | 1  | -1.510711 | -2.838778 | -0.003337 |
| 35 | 1  | -2.397105 | -2.604820 | 1.507469  |
| 36 | 1  | 4.348527  | -1.082685 | 0.323700  |
| 37 | 1  | 4.356696  | -2.055142 | 1.792423  |
| 38 | 1  | 4.506451  | 0.267951  | 2.399428  |
| 39 | 1  | 2.957922  | -0.350543 | 2.929519  |
| 40 | 1  | 2.986205  | 2.195244  | 3.067847  |
| 41 | 1  | 2.012611  | 2.859766  | 1.763723  |
| 42 | 1  | 0.688279  | 2.140124  | 3.741640  |
| 43 | 1  | 1.237107  | 0.493590  | 3.517054  |
| 44 | 1  | -1.286613 | 0.604428  | 3.769954  |
| 45 | 1  | -2.063445 | 0.355837  | 2.223499  |
| 46 | 1  | 0.240949  | -1.282966 | 3.365592  |
| 47 | 1  | -1.439496 | -1.767253 | 3.330657  |
| 48 | 1  | 0.285597  | -3.588998 | 0.674883  |
| 49 | 1  | 0.016904  | -3.635692 | 2.413949  |
| 50 | 1  | 1.967046  | -2.128275 | 2.755718  |
| 51 | 1  | 2.380052  | -3.657528 | 2.014069  |
| 52 | 8  | 1.663910  | 2.916452  | -2.774626 |
| 53 | 1  | 1.372878  | 2.971075  | -1.845142 |
| 54 | 1  | 0.683843  | 1.375583  | -2.767255 |
| 55 | 64 | 0.865835  | -0.059013 | -0.157829 |
| 56 | 8  | 0.295820  | 0.505171  | -2.544804 |
| 57 | 1  | 0.793830  | -0.118138 | -3.110982 |
| 58 | 6  | -3.757249 | -0.843105 | -0.130989 |
| 59 | 6  | -4.670431 | -1.817762 | 0.330160  |
| 60 | 6  | -4.283867 | 0.273459  | -0.845639 |
| 61 | 6  | -6.017601 | -1.706870 | 0.114904  |
| 62 | 1  | -4.308188 | -2.684232 | 0.866655  |
| 63 | 6  | -5.649176 | 0.393150  | -1.054482 |
| 64 | 6  | -6.511978 | -0.585489 | -0.579939 |
| 65 | 1  | -6.698692 | -2.467747 | 0.476662  |
| 66 | 1  | -6.036637 | 1.247360  | -1.594055 |
| 67 | 1  | 2.593861  | 2.660195  | -2.721665 |
| 68 | 8  | 2.285408  | -0.942697 | -3.800567 |
| 69 | 1  | 2.181895  | -1.884568 | -3.605974 |
| 70 | 1  | 2.749853  | -0.582649 | -3.023416 |
| 71 | 1  | -2.573112 | 0.998779  | -1.147234 |
| 72 | 8  | -3.469356 | 3.751191  | 0.297630  |
| 73 | 1  | -2.549177 | 4.036154  | 0.190184  |
| 74 | 1  | -3.577603 | 3.061466  | -0.365013 |
| 75 | 8  | -3.502898 | 1.241089  | -1.340025 |

|    |   |           |           |           |
|----|---|-----------|-----------|-----------|
| 76 | 8 | -7.817299 | -0.413296 | -0.814315 |
| 77 | 1 | -8.326773 | -1.143257 | -0.450814 |

-----

E(RwB97XD) = -2093.8873186 Hartree  
Zero-point correction = 0.633825  
Thermal correction to Energy = 0.675124  
Thermal correction to Enthalpy = 0.676068  
Thermal correction to Gibbs Free Energy = 0.563376  
Sum of electronic and zero-point Energies = -2093.253493  
Sum of electronic and thermal Energies = -2093.212195  
Sum of electronic and thermal Enthalpies = -2093.211250  
Sum of electronic and thermal Free Energies = -2093.323942

**Table S6.** Optimized Cartesian coordinates (Å) obtained for the GdDO3A-*o*HAP·4H<sub>2</sub>O system (1 Imaginary Frequency).

| Center<br>Number | Coordinates (Angstroms) |           |           |           |
|------------------|-------------------------|-----------|-----------|-----------|
|                  | X                       | Y         | Z         |           |
| 1                | 7                       | 2.478485  | -1.844499 | 0.620647  |
| 2                | 6                       | 3.809175  | -1.232716 | 0.846491  |
| 3                | 6                       | 3.728941  | 0.109529  | 1.559155  |
| 4                | 7                       | 2.937124  | 1.119379  | 0.824085  |
| 5                | 6                       | 2.533646  | 2.217984  | 1.730490  |
| 6                | 6                       | 1.391047  | 1.833645  | 2.655100  |
| 7                | 7                       | 0.146010  | 1.460926  | 1.947321  |
| 8                | 6                       | -0.733411 | 0.699941  | 2.863567  |
| 9                | 6                       | -0.313387 | -0.752491 | 3.013665  |
| 10               | 7                       | -0.309085 | -1.513424 | 1.743943  |
| 11               | 6                       | 0.501670  | -2.744482 | 1.899158  |
| 12               | 6                       | 1.998856  | -2.476116 | 1.870681  |
| 13               | 6                       | 2.547946  | -2.832788 | -0.470663 |
| 14               | 6                       | 1.209531  | -3.112270 | -1.158060 |
| 15               | 8                       | 0.362173  | -2.136745 | -1.133570 |
| 16               | 8                       | 1.034858  | -4.179355 | -1.722292 |
| 17               | 6                       | 3.706097  | 1.656099  | -0.314461 |
| 18               | 6                       | 3.656461  | 0.791093  | -1.579935 |
| 19               | 8                       | 4.614454  | 0.786771  | -2.337187 |
| 20               | 8                       | 2.542550  | 0.171458  | -1.775476 |
| 21               | 6                       | -0.558390 | 2.654465  | 1.441848  |
| 22               | 6                       | -0.196472 | 3.098681  | 0.022472  |
| 23               | 8                       | -0.687348 | 4.148111  | -0.388489 |
| 24               | 8                       | 0.554271  | 2.318533  | -0.658364 |
| 25               | 6                       | -1.679346 | -1.864292 | 1.339665  |
| 26               | 6                       | -2.339642 | -0.778788 | 0.511296  |
| 27               | 8                       | -1.617484 | 0.089422  | 0.017699  |
| 28               | 1                       | 3.185398  | -2.422466 | -1.257770 |
| 29               | 1                       | 2.989388  | -3.776471 | -0.133372 |
| 30               | 1                       | 4.748233  | 1.847159  | -0.038690 |
| 31               | 1                       | 3.251271  | 2.605203  | -0.608297 |
| 32               | 1                       | -0.432987 | 3.510144  | 2.114926  |
| 33               | 1                       | -1.629616 | 2.447485  | 1.393752  |
| 34               | 1                       | -1.645367 | -2.737350 | 0.681225  |
| 35               | 1                       | -2.287323 | -2.135277 | 2.207967  |
| 36               | 1                       | 4.293115  | -1.106857 | -0.121550 |
| 37               | 1                       | 4.448942  | -1.903855 | 1.432737  |





|    |    |           |           |           |
|----|----|-----------|-----------|-----------|
| 1  | 7  | 2.505121  | -1.966729 | 0.738511  |
| 2  | 6  | 3.763804  | -1.342587 | 1.204296  |
| 3  | 6  | 3.534396  | -0.095310 | 2.040724  |
| 4  | 7  | 2.822970  | 0.983215  | 1.322596  |
| 5  | 6  | 2.248980  | 1.940008  | 2.295615  |
| 6  | 6  | 1.000474  | 1.412306  | 2.981199  |
| 7  | 7  | -0.125055 | 1.132609  | 2.061691  |
| 8  | 6  | -1.109448 | 0.263450  | 2.741839  |
| 9  | 6  | -0.677806 | -1.192426 | 2.788077  |
| 10 | 7  | -0.438189 | -1.788157 | 1.455515  |
| 11 | 6  | 0.388925  | -3.011418 | 1.591713  |
| 12 | 6  | 1.858174  | -2.707352 | 1.838758  |
| 13 | 6  | 2.767080  | -2.846299 | -0.415623 |
| 14 | 6  | 1.674700  | -2.868063 | -1.490606 |
| 15 | 8  | 0.667303  | -2.106771 | -1.314848 |
| 16 | 8  | 1.880712  | -3.566018 | -2.484471 |
| 17 | 6  | 3.712630  | 1.686570  | 0.377881  |
| 18 | 6  | 3.692829  | 1.173197  | -1.065949 |
| 19 | 8  | 4.356968  | 1.784348  | -1.898619 |
| 20 | 8  | 2.931104  | 0.174303  | -1.315686 |
| 21 | 6  | -0.769247 | 2.382780  | 1.624111  |
| 22 | 6  | -0.206090 | 3.008622  | 0.346382  |
| 23 | 8  | -0.645460 | 4.105430  | 0.005145  |
| 24 | 8  | 0.656230  | 2.324976  | -0.304817 |
| 25 | 6  | -1.711871 | -2.126323 | 0.802841  |
| 26 | 6  | -2.344888 | -0.941442 | 0.103889  |
| 27 | 8  | -1.572341 | -0.053543 | -0.317635 |
| 28 | 1  | 3.656828  | -2.486006 | -0.932783 |
| 29 | 1  | 2.975760  | -3.875272 | -0.100183 |
| 30 | 1  | 4.750571  | 1.692962  | 0.730815  |
| 31 | 1  | 3.395890  | 2.727616  | 0.309374  |
| 32 | 1  | -0.751583 | 3.143251  | 2.413690  |
| 33 | 1  | -1.822635 | 2.193770  | 1.408362  |
| 34 | 1  | -1.510711 | -2.838778 | -0.003337 |
| 35 | 1  | -2.397105 | -2.604820 | 1.507469  |
| 36 | 1  | 4.348527  | -1.082685 | 0.323700  |
| 37 | 1  | 4.356696  | -2.055142 | 1.792423  |
| 38 | 1  | 4.506451  | 0.267951  | 2.399428  |
| 39 | 1  | 2.957922  | -0.350543 | 2.929519  |
| 40 | 1  | 2.986205  | 2.195244  | 3.067847  |
| 41 | 1  | 2.012611  | 2.859766  | 1.763723  |
| 42 | 1  | 0.688279  | 2.140124  | 3.741640  |
| 43 | 1  | 1.237107  | 0.493590  | 3.517054  |
| 44 | 1  | -1.286613 | 0.604428  | 3.769954  |
| 45 | 1  | -2.063445 | 0.355837  | 2.223499  |
| 46 | 1  | 0.240949  | -1.282966 | 3.365592  |
| 47 | 1  | -1.439496 | -1.767253 | 3.330657  |
| 48 | 1  | 0.285597  | -3.588998 | 0.674883  |
| 49 | 1  | 0.016904  | -3.635692 | 2.413949  |
| 50 | 1  | 1.967046  | -2.128275 | 2.755718  |
| 51 | 1  | 2.380052  | -3.657528 | 2.014069  |
| 52 | 8  | 1.663910  | 2.916452  | -2.774626 |
| 53 | 1  | 1.372878  | 2.971075  | -1.845142 |
| 54 | 1  | 0.683843  | 1.375583  | -2.767255 |
| 55 | 64 | 0.865835  | -0.059013 | -0.157829 |
| 56 | 8  | 0.295820  | 0.505171  | -2.544804 |
| 57 | 1  | 0.793830  | -0.118138 | -3.110982 |
| 58 | 6  | -3.757249 | -0.843105 | -0.130989 |
| 59 | 6  | -4.670431 | -1.817762 | 0.330160  |
| 60 | 6  | -4.283867 | 0.273459  | -0.845639 |

|    |   |           |           |           |
|----|---|-----------|-----------|-----------|
| 61 | 6 | -6.017601 | -1.706870 | 0.114904  |
| 62 | 1 | -4.308188 | -2.684232 | 0.866655  |
| 63 | 6 | -5.649176 | 0.393150  | -1.054482 |
| 64 | 6 | -6.511978 | -0.585489 | -0.579939 |
| 65 | 1 | -6.698692 | -2.467747 | 0.476662  |
| 66 | 1 | -6.036637 | 1.247360  | -1.594055 |
| 67 | 1 | 2.593861  | 2.660195  | -2.721665 |
| 68 | 8 | 2.285408  | -0.942697 | -3.800567 |
| 69 | 1 | 2.181895  | -1.884568 | -3.605974 |
| 70 | 1 | 2.749853  | -0.582649 | -3.023416 |
| 71 | 1 | -2.573112 | 0.998779  | -1.147234 |
| 72 | 8 | -3.469356 | 3.751191  | 0.297630  |
| 73 | 1 | -2.549177 | 4.036154  | 0.190184  |
| 74 | 1 | -3.577603 | 3.061466  | -0.365013 |
| 75 | 8 | -3.502898 | 1.241089  | -1.340025 |
| 76 | 8 | -7.817299 | -0.413296 | -0.814315 |
| 77 | 1 | -8.326773 | -1.143257 | -0.450814 |

-----  
E(RwB97XD) = -2093.8873186 Hartree

Zero-point correction = 0.633825

Thermal correction to Energy = 0.675124

Thermal correction to Enthalpy = 0.676068

Thermal correction to Gibbs Free Energy = 0.563376

Sum of electronic and zero-point Energies = -2093.253493

Sum of electronic and thermal Energies = -2093.212195

Sum of electronic and thermal Enthalpies = -2093.211250

Sum of electronic and thermal Free Energies = -2093.323942

**Table S8.** Optimized Cartesian coordinates (Å) obtained for the GdDO3A-DiHAP·4H<sub>2</sub>O system (1 Imaginary Frequency).

| Center<br>Number | Coordinates (Angstroms) |           |           |           |
|------------------|-------------------------|-----------|-----------|-----------|
|                  | X                       | Y         | Z         |           |
| 1                | 7                       | -2.660356 | -1.877630 | -0.568384 |
| 2                | 6                       | -3.953065 | -1.257135 | -0.938009 |
| 3                | 6                       | -3.779862 | 0.009921  | -1.761854 |
| 4                | 7                       | -3.011268 | 1.063440  | -1.065250 |
| 5                | 6                       | -2.510696 | 2.064382  | -2.033479 |
| 6                | 6                       | -1.311352 | 1.574028  | -2.826917 |
| 7                | 7                       | -0.132176 | 1.230270  | -1.999328 |
| 8                | 6                       | 0.780456  | 0.368820  | -2.784625 |
| 9                | 6                       | 0.322398  | -1.079124 | -2.846472 |
| 10               | 7                       | 0.202495  | -1.727800 | -1.522893 |
| 11               | 6                       | -0.638893 | -2.941004 | -1.627308 |
| 12               | 6                       | -2.122356 | -2.624622 | -1.725426 |
| 13               | 6                       | -2.831146 | -2.765032 | 0.595936  |
| 14               | 6                       | -1.551471 | -3.010798 | 1.400224  |
| 15               | 8                       | -0.683804 | -2.054843 | 1.355582  |
| 16               | 8                       | -1.442314 | -4.030743 | 2.059753  |
| 17               | 6                       | -3.844611 | 1.719926  | -0.041406 |
| 18               | 6                       | -3.922145 | 0.962144  | 1.288603  |
| 19               | 8                       | -4.932849 | 1.049472  | 1.968262  |
| 20               | 8                       | -2.848600 | 0.327424  | 1.618209  |
| 21               | 6                       | 0.578942  | 2.442430  | -1.552231 |
| 22               | 6                       | 0.106555  | 3.045197  | -0.226265 |
| 23               | 8                       | 0.604961  | 4.114148  | 0.122628  |

|    |    |           |           |           |
|----|----|-----------|-----------|-----------|
| 24 | 8  | -0.742662 | 2.370018  | 0.448237  |
| 25 | 6  | 1.525336  | -2.085958 | -0.996259 |
| 26 | 6  | 2.194803  | -0.921419 | -0.298762 |
| 27 | 8  | 1.448889  | -0.059793 | 0.197515  |
| 28 | 1  | -3.510221 | -2.273225 | 1.296910  |
| 29 | 1  | -3.273258 | -3.725625 | 0.310974  |
| 30 | 1  | -4.855502 | 1.918388  | -0.412291 |
| 31 | 1  | -3.379236 | 2.676654  | 0.208126  |
| 32 | 1  | 0.554962  | 3.227938  | -2.316466 |
| 33 | 1  | 1.631344  | 2.202305  | -1.386705 |
| 34 | 1  | 1.397609  | -2.833924 | -0.207524 |
| 35 | 1  | 2.152483  | -2.529033 | -1.774211 |
| 36 | 1  | -4.497581 | -1.031574 | -0.021792 |
| 37 | 1  | -4.573023 | -1.962617 | -1.505327 |
| 38 | 1  | -4.773139 | 0.387504  | -2.037000 |
| 39 | 1  | -3.271040 | -0.224827 | -2.696492 |
| 40 | 1  | -3.301836 | 2.347883  | -2.739373 |
| 41 | 1  | -2.241334 | 2.959540  | -1.475815 |
| 42 | 1  | -1.040945 | 2.344690  | -3.560233 |
| 43 | 1  | -1.590224 | 0.690534  | -3.400878 |
| 44 | 1  | 0.879730  | 0.743899  | -3.810969 |
| 45 | 1  | 1.774236  | 0.429554  | -2.342533 |
| 46 | 1  | -0.649133 | -1.132828 | -3.336031 |
| 47 | 1  | 1.019499  | -1.639399 | -3.483377 |
| 48 | 1  | -0.449865 | -3.561678 | -0.752628 |
| 49 | 1  | -0.353832 | -3.535608 | -2.504655 |
| 50 | 1  | -2.315251 | -2.042439 | -2.626249 |
| 51 | 1  | -2.668603 | -3.568981 | -1.847479 |
| 52 | 8  | -1.457369 | 2.463171  | 3.114093  |
| 53 | 1  | -1.240462 | 2.691336  | 2.191731  |
| 54 | 1  | 0.177607  | 1.505674  | 3.050801  |
| 55 | 64 | -0.974225 | 0.005353  | 0.236338  |
| 56 | 8  | 0.923824  | 1.017535  | 2.669237  |
| 57 | 1  | 0.947851  | 0.141240  | 3.095339  |
| 58 | 6  | 3.619372  | -0.813942 | -0.149744 |
| 59 | 6  | 4.506509  | -1.708805 | -0.787371 |
| 60 | 6  | 4.181029  | 0.244941  | 0.622033  |
| 61 | 6  | 5.866337  | -1.573952 | -0.698725 |
| 62 | 1  | 4.112778  | -2.527993 | -1.373676 |
| 63 | 6  | 5.560216  | 0.387150  | 0.701485  |
| 64 | 6  | 6.397510  | -0.505843 | 0.047935  |
| 65 | 1  | 6.525080  | -2.271739 | -1.201912 |
| 66 | 1  | 5.979300  | 1.195914  | 1.285799  |
| 67 | 1  | -2.061172 | 1.718134  | 3.002802  |
| 68 | 8  | 1.030685  | -1.639125 | 3.406956  |
| 69 | 1  | 0.432210  | -1.934581 | 2.689559  |
| 70 | 1  | 0.600960  | -1.916062 | 4.218077  |
| 71 | 8  | 3.458689  | 1.143035  | 1.300619  |
| 72 | 1  | 2.502060  | 0.933731  | 1.288146  |
| 73 | 8  | 3.388405  | 3.645206  | -0.290342 |
| 74 | 1  | 2.486436  | 3.972967  | -0.154479 |
| 75 | 1  | 3.472207  | 2.934129  | 0.353932  |
| 76 | 8  | 7.716135  | -0.305677 | 0.165861  |
| 77 | 1  | 8.203756  | -0.976857 | -0.319784 |

-----  
E(RwB97XD) = -2093.8763053 Hartree  
Zero-point correction = 0.631998  
Thermal correction to Energy = 0.673458  
Thermal correction to Enthalpy = 0.674402

Thermal correction to Gibbs Free Energy = 0.560258  
 Sum of electronic and zero-point Energies = -2093.244308  
 Sum of electronic and thermal Energies = -2093.202847  
 Sum of electronic and thermal Enthalpies = -2093.201903  
 Sum of electronic and thermal Free Energies = -2093.316047

**Table S9.** Optimized Cartesian coordinates (Å) obtained for the GdDO3A-*o*AnAP·3H<sub>2</sub>O system (0 Imaginary Frequencies).

| Center<br>Number | Coordinates (Angstroms) |           |           |           |
|------------------|-------------------------|-----------|-----------|-----------|
|                  | X                       | Y         | Z         |           |
| 1                | 7                       | 1.912629  | -2.101685 | 0.843283  |
| 2                | 6                       | 3.270700  | -1.654536 | 1.223581  |
| 3                | 6                       | 3.275309  | -0.333792 | 1.973955  |
| 4                | 7                       | 2.702412  | 0.797606  | 1.213283  |
| 5                | 6                       | 2.326569  | 1.878161  | 2.152113  |
| 6                | 6                       | 1.022755  | 1.599881  | 2.883060  |
| 7                | 7                       | -0.147636 | 1.444889  | 1.992906  |
| 8                | 6                       | -1.250932 | 0.800760  | 2.737032  |
| 9                | 6                       | -1.058612 | -0.699544 | 2.891966  |
| 10               | 7                       | -0.947513 | -1.427801 | 1.609269  |
| 11               | 6                       | -0.302497 | -2.743820 | 1.829558  |
| 12               | 6                       | 1.202722  | -2.643766 | 2.017459  |
| 13               | 6                       | 1.987077  | -3.093936 | -0.244003 |
| 14               | 6                       | 0.867550  | -3.018860 | -1.288420 |
| 15               | 8                       | 0.001572  | -2.094457 | -1.153634 |
| 16               | 8                       | 0.925965  | -3.816403 | -2.226393 |
| 17               | 6                       | 3.644427  | 1.303248  | 0.197685  |
| 18               | 6                       | 3.523190  | 0.675249  | -1.194828 |
| 19               | 8                       | 4.265618  | 1.098638  | -2.077424 |
| 20               | 8                       | 2.606424  | -0.202996 | -1.356805 |
| 21               | 6                       | -0.579726 | 2.751688  | 1.468251  |
| 22               | 6                       | 0.237913  | 3.255391  | 0.273499  |
| 23               | 8                       | 0.345543  | 4.457517  | 0.085351  |
| 24               | 8                       | 0.718406  | 2.334078  | -0.486671 |
| 25               | 6                       | -2.274022 | -1.625968 | 1.005497  |
| 26               | 6                       | -2.734511 | -0.437225 | 0.177738  |
| 27               | 8                       | -1.852809 | 0.331353  | -0.245948 |
| 28               | 1                       | 2.903794  | -2.922498 | -0.809237 |
| 29               | 1                       | 2.039822  | -4.117568 | 0.145549  |
| 30               | 1                       | 4.685145  | 1.216278  | 0.531800  |
| 31               | 1                       | 3.447574  | 2.364416  | 0.040339  |
| 32               | 1                       | -0.588162 | 3.518328  | 2.250941  |
| 33               | 1                       | -1.600686 | 2.645973  | 1.092390  |
| 34               | 1                       | -2.211642 | -2.453218 | 0.292611  |
| 35               | 1                       | -3.007536 | -1.900853 | 1.768479  |
| 36               | 1                       | 3.852576  | -1.551647 | 0.309815  |
| 37               | 1                       | 3.768920  | -2.409859 | 1.845851  |
| 38               | 1                       | 4.308199  | -0.104258 | 2.267523  |
| 39               | 1                       | 2.711023  | -0.436221 | 2.900690  |
| 40               | 1                       | 3.115015  | 2.032806  | 2.900027  |
| 41               | 1                       | 2.244221  | 2.807773  | 1.591494  |
| 42               | 1                       | 0.843986  | 2.415487  | 3.596593  |
| 43               | 1                       | 1.121449  | 0.690435  | 3.475579  |
| 44               | 1                       | -1.353830 | 1.241475  | 3.737175  |
| 45               | 1                       | -2.183305 | 1.007173  | 2.212638  |

|    |    |           |           |           |
|----|----|-----------|-----------|-----------|
| 46 | 1  | -0.153842 | -0.893013 | 3.467023  |
| 47 | 1  | -1.890491 | -1.099934 | 3.486188  |
| 48 | 1  | -0.518471 | -3.370521 | 0.965894  |
| 49 | 1  | -0.733504 | -3.241121 | 2.707927  |
| 50 | 1  | 1.427492  | -2.010218 | 2.875416  |
| 51 | 1  | 1.586027  | -3.643017 | 2.265095  |
| 52 | 8  | 1.759925  | 2.597617  | -2.978537 |
| 53 | 1  | 1.508570  | 2.743251  | -2.045255 |
| 54 | 1  | 0.552781  | 1.226415  | -2.860128 |
| 55 | 64 | 0.548426  | -0.020583 | -0.150881 |
| 56 | 8  | 0.038719  | 0.443233  | -2.577718 |
| 57 | 1  | 0.430878  | -0.288150 | -3.095118 |
| 58 | 6  | -4.122126 | -0.242817 | -0.155126 |
| 59 | 6  | -5.111862 | -1.142226 | 0.316371  |
| 60 | 6  | -4.526306 | 0.847208  | -0.989430 |
| 61 | 6  | -6.436157 | -0.996056 | 0.001859  |
| 62 | 1  | -4.818005 | -1.977001 | 0.938592  |
| 63 | 6  | -5.905019 | 0.978046  | -1.291610 |
| 64 | 6  | -6.825456 | 0.084199  | -0.811421 |
| 65 | 1  | -7.171646 | -1.697841 | 0.372598  |
| 66 | 1  | -6.219619 | 1.803855  | -1.919884 |
| 67 | 1  | -7.871168 | 0.214943  | -1.066551 |
| 68 | 1  | 2.638889  | 2.200174  | -2.932564 |
| 69 | 8  | 1.759996  | -1.393897 | -3.728978 |
| 70 | 1  | 1.508783  | -2.289909 | -3.465730 |
| 71 | 1  | 2.280306  | -1.053797 | -2.977809 |
| 72 | 1  | -2.674798 | 1.636117  | -1.349300 |
| 73 | 7  | -3.665265 | 1.753595  | -1.489543 |
| 74 | 1  | -4.001179 | 2.461665  | -2.119297 |

-----  
E(RwB97XD) = -1922.3458807 Hartree

Zero-point correction = 0.614893

Thermal correction to Energy = 0.653162

Thermal correction to Enthalpy = 0.654107

Thermal correction to Gibbs Free Energy = 0.547365

Sum of electronic and zero-point Energies = -1921.730988

Sum of electronic and thermal Energies = -1921.692718

Sum of electronic and thermal Enthalpies = -1921.691774

Sum of electronic and thermal Free Energies = -1921.798515

**Table S10.** Optimized Cartesian coordinates (Å) obtained for the GdDO3A-*o*AnAP·3H<sub>2</sub>O system (1 Imaginary Frequency).

| Center<br>Number |   | Coordinates (Angstroms) |           |           |
|------------------|---|-------------------------|-----------|-----------|
|                  |   | X                       | Y         | Z         |
| 1                | 7 | 2.113645                | 2.066555  | -0.536253 |
| 2                | 6 | 3.495500                | 1.642631  | -0.848668 |
| 3                | 6 | 3.536873                | 0.364842  | -1.669002 |
| 4                | 7 | 2.901448                | -0.784296 | -0.993598 |
| 5                | 6 | 2.596256                | -1.844223 | -1.978351 |
| 6                | 6 | 1.356568                | -1.544245 | -2.806248 |
| 7                | 7 | 0.117262                | -1.374840 | -2.015263 |
| 8                | 6 | -0.890738               | -0.666702 | -2.833844 |
| 9                | 6 | -0.643762               | 0.832447  | -2.903355 |
| 10               | 7 | -0.667756               | 1.509956  | -1.588888 |

|    |    |           |           |           |
|----|----|-----------|-----------|-----------|
| 11 | 6  | 0.004525  | 2.823960  | -1.687143 |
| 12 | 6  | 1.519067  | 2.712833  | -1.725973 |
| 13 | 6  | 2.113478  | 2.987510  | 0.613572  |
| 14 | 6  | 0.784210  | 3.068876  | 1.368707  |
| 15 | 8  | 0.053217  | 2.006973  | 1.312056  |
| 16 | 8  | 0.519425  | 4.074619  | 2.007304  |
| 17 | 6  | 3.776923  | -1.308522 | 0.069102  |
| 18 | 6  | 3.690976  | -0.543708 | 1.395020  |
| 19 | 8  | 4.679813  | -0.473560 | 2.109156  |
| 20 | 8  | 2.522596  | -0.082146 | 1.686966  |
| 21 | 6  | -0.406640 | -2.678829 | -1.572221 |
| 22 | 6  | 0.299109  | -3.261870 | -0.341834 |
| 23 | 8  | 0.301570  | -4.472023 | -0.175679 |
| 24 | 8  | 0.801222  | -2.392244 | 0.461997  |
| 25 | 6  | -2.050157 | 1.696638  | -1.125696 |
| 26 | 6  | -2.582592 | 0.481326  | -0.386690 |
| 27 | 8  | -1.740341 | -0.289159 | 0.099674  |
| 28 | 1  | 2.827375  | 2.607248  | 1.348597  |
| 29 | 1  | 2.429742  | 3.995632  | 0.324037  |
| 30 | 1  | 4.820692  | -1.360094 | -0.258333 |
| 31 | 1  | 3.443148  | -2.320683 | 0.310079  |
| 32 | 1  | -0.393317 | -3.415549 | -2.382956 |
| 33 | 1  | -1.445443 | -2.538346 | -1.261515 |
| 34 | 1  | -2.067106 | 2.501704  | -0.385118 |
| 35 | 1  | -2.697931 | 1.997788  | -1.953682 |
| 36 | 1  | 4.029667  | 1.498418  | 0.089861  |
| 37 | 1  | 4.028436  | 2.430873  | -1.395726 |
| 38 | 1  | 4.583226  | 0.132132  | -1.906770 |
| 39 | 1  | 3.032726  | 0.522521  | -2.622342 |
| 40 | 1  | 3.440824  | -1.988375 | -2.664682 |
| 41 | 1  | 2.466869  | -2.780829 | -1.439240 |
| 42 | 1  | 1.224151  | -2.352324 | -3.537877 |
| 43 | 1  | 1.516713  | -0.633326 | -3.382889 |
| 44 | 1  | -0.903633 | -1.062135 | -3.857584 |
| 45 | 1  | -1.876637 | -0.868239 | -2.416576 |
| 46 | 1  | 0.328272  | 1.018821  | -3.358689 |
| 47 | 1  | -1.388596 | 1.279635  | -3.574760 |
| 48 | 1  | -0.299977 | 3.425769  | -0.832425 |
| 49 | 1  | -0.324547 | 3.361658  | -2.585880 |
| 50 | 1  | 1.822757  | 2.147354  | -2.606394 |
| 51 | 1  | 1.935303  | 3.721336  | -1.849810 |
| 52 | 8  | 1.477956  | -2.384324 | 3.129005  |
| 53 | 1  | 1.312399  | -2.637991 | 2.201374  |
| 54 | 1  | -0.270924 | -1.666206 | 3.069676  |
| 55 | 64 | 0.659416  | -0.032272 | 0.244165  |
| 56 | 8  | -1.071245 | -1.282912 | 2.677227  |
| 57 | 1  | -1.216697 | -0.415630 | 3.097197  |
| 58 | 6  | -3.991696 | 0.253051  | -0.203408 |
| 59 | 6  | -4.946661 | 1.104199  | -0.814791 |
| 60 | 6  | -4.452257 | -0.840304 | 0.597664  |
| 61 | 6  | -6.293906 | 0.903619  | -0.678385 |
| 62 | 1  | -4.606684 | 1.941487  | -1.409585 |
| 63 | 6  | -5.854438 | -1.029089 | 0.707795  |
| 64 | 6  | -6.740794 | -0.185861 | 0.091772  |
| 65 | 1  | -7.002331 | 1.567237  | -1.156640 |
| 66 | 1  | -6.216354 | -1.859332 | 1.304201  |
| 67 | 1  | -7.804485 | -0.363101 | 0.205732  |
| 68 | 1  | 1.951504  | -1.549044 | 3.024980  |
| 69 | 8  | -1.518359 | 1.342982  | 3.415432  |
| 70 | 1  | -1.003487 | 1.717265  | 2.670317  |

|    |   |           |           |          |
|----|---|-----------|-----------|----------|
| 71 | 1 | -1.082810 | 1.671181  | 4.204106 |
| 72 | 1 | -2.649305 | -1.512218 | 1.362383 |
| 73 | 7 | -3.637514 | -1.702358 | 1.237887 |
| 74 | 1 | -4.061649 | -2.351500 | 1.879933 |

-----  
E(RwB97XD) = -1922.3349016 Hartree  
Zero-point correction = 0.613889  
Thermal correction to Energy = 0.652051  
Thermal correction to Enthalpy = 0.652995  
Thermal correction to Gibbs Free Energy = 0.545024  
Sum of electronic and zero-point Energies = -1921.721012  
Sum of electronic and thermal Energies = -1921.682851  
Sum of electronic and thermal Enthalpies = -1921.681907  
Sum of electronic and thermal Free Energies = -1921.789878

**Table S11.** Optimized Cartesian coordinates (Å) obtained for the GdDO3A-*p*HAP·3H<sub>2</sub>O system (0 Imaginary Frequencies).

| Center<br>Number |   | Coordinates (Angstroms) |           |           |
|------------------|---|-------------------------|-----------|-----------|
|                  |   | X                       | Y         | Z         |
| 1                | 7 | -1.968264               | -2.003626 | -1.037704 |
| 2                | 6 | -3.359540               | -1.572289 | -1.303577 |
| 3                | 6 | -3.450247               | -0.168191 | -1.877387 |
| 4                | 7 | -2.890752               | 0.880537  | -0.998634 |
| 5                | 6 | -2.595557               | 2.091947  | -1.795394 |
| 6                | 6 | -1.314713               | 1.975217  | -2.606611 |
| 7                | 7 | -0.098025               | 1.750652  | -1.796317 |
| 8                | 6 | 0.988459                | 1.253512  | -2.665664 |
| 9                | 6 | 0.831464                | -0.217502 | -3.015706 |
| 10               | 7 | 0.820241                | -1.114650 | -1.840587 |
| 11               | 6 | 0.216617                | -2.420202 | -2.199693 |
| 12               | 6 | -1.298812               | -2.368572 | -2.301814 |
| 13               | 6 | -1.957423               | -3.128617 | -0.084508 |
| 14               | 6 | -0.787566               | -3.148391 | 0.906243  |
| 15               | 8 | 0.037315                | -2.178146 | 0.856709  |
| 16               | 8 | -0.769290               | -4.064669 | 1.729670  |
| 17               | 6 | -3.804517               | 1.206146  | 0.111711  |
| 18               | 6 | -3.593893               | 0.410939  | 1.404364  |
| 19               | 8 | -4.308889               | 0.684726  | 2.364835  |
| 20               | 8 | -2.638409               | -0.441187 | 1.412377  |
| 21               | 6 | 0.312484                | 2.989820  | -1.116037 |
| 22               | 6 | -0.475156               | 3.295719  | 0.162897  |
| 23               | 8 | -0.623125               | 4.456541  | 0.512832  |
| 24               | 8 | -0.887640               | 2.261779  | 0.810182  |
| 25               | 6 | 2.181314                | -1.325857 | -1.329607 |
| 26               | 6 | 2.626835                | -0.270545 | -0.337519 |
| 27               | 8 | 1.776644                | 0.430080  | 0.212828  |
| 28               | 1 | -2.847772               | -3.061876 | 0.541640  |
| 29               | 1 | -2.001717               | -4.095227 | -0.599918 |
| 30               | 1 | -4.855174               | 1.114337  | -0.188336 |
| 31               | 1 | -3.644887               | 2.246162  | 0.398583  |
| 32               | 1 | 0.264663                | 3.854279  | -1.787521 |
| 33               | 1 | 1.350165                | 2.872838  | -0.792567 |
| 34               | 1 | 2.204584                | -2.262498 | -0.764395 |
| 35               | 1 | 2.900710                | -1.422074 | -2.149768 |
| 36               | 1 | -3.904511               | -1.613778 | -0.362592 |

|    |    |           |           |           |
|----|----|-----------|-----------|-----------|
| 37 | 1  | -3.853971 | -2.264339 | -1.998070 |
| 38 | 1  | -4.503453 | 0.048815  | -2.099857 |
| 39 | 1  | -2.923235 | -0.127577 | -2.830741 |
| 40 | 1  | -3.420331 | 2.311557  | -2.485940 |
| 41 | 1  | -2.525974 | 2.939844  | -1.116306 |
| 42 | 1  | -1.201013 | 2.888973  | -3.205451 |
| 43 | 1  | -1.406995 | 1.153966  | -3.316926 |
| 44 | 1  | 1.034804  | 1.829276  | -3.599249 |
| 45 | 1  | 1.937049  | 1.417499  | -2.155175 |
| 46 | 1  | -0.099928 | -0.366335 | -3.560385 |
| 47 | 1  | 1.637661  | -0.502916 | -3.704178 |
| 48 | 1  | 0.502009  | -3.140957 | -1.435351 |
| 49 | 1  | 0.620760  | -2.781420 | -3.154100 |
| 50 | 1  | -1.593429 | -1.650308 | -3.066873 |
| 51 | 1  | -1.653146 | -3.348537 | -2.648800 |
| 52 | 8  | -1.822632 | 2.161057  | 3.356432  |
| 53 | 1  | -1.617048 | 2.437653  | 2.441800  |
| 54 | 1  | -0.577009 | 0.861516  | 3.017653  |
| 55 | 64 | -0.642815 | -0.020754 | 0.172099  |
| 56 | 8  | -0.054222 | 0.138883  | 2.615099  |
| 57 | 1  | -0.402742 | -0.666998 | 3.046325  |
| 58 | 6  | 4.039667  | -0.126225 | 0.004436  |
| 59 | 6  | 5.036692  | -0.961368 | -0.516237 |
| 60 | 6  | 4.405792  | 0.876829  | 0.917006  |
| 61 | 6  | 6.356051  | -0.805645 | -0.136918 |
| 62 | 6  | 5.718517  | 1.046852  | 1.292979  |
| 63 | 6  | 6.703573  | 0.201801  | 0.767885  |
| 64 | 1  | 7.120585  | -1.460818 | -0.539364 |
| 65 | 1  | 6.008082  | 1.821000  | 1.992453  |
| 66 | 1  | -2.688900 | 1.739290  | 3.291578  |
| 67 | 8  | -1.655179 | -1.901537 | 3.570159  |
| 68 | 1  | -1.379531 | -2.743485 | 3.182739  |
| 69 | 1  | -2.221895 | -1.490381 | 2.891670  |
| 70 | 1  | 3.636403  | 1.521388  | 1.323143  |
| 71 | 1  | 4.795329  | -1.752240 | -1.215224 |
| 72 | 8  | 7.966387  | 0.407939  | 1.171997  |
| 73 | 1  | 8.559699  | -0.224798 | 0.757763  |

-----  
E(RwB97XD) = -1942.204832 Hartree  
Zero-point correction = 0.602989  
Thermal correction to Energy = 0.640869  
Thermal correction to Enthalpy = 0.641813  
Thermal correction to Gibbs Free Energy = 0.535906  
Sum of electronic and zero-point Energies = -1941.601843  
Sum of electronic and thermal Energies = -1941.563963  
Sum of electronic and thermal Enthalpies = -1941.563019  
Sum of electronic and thermal Free Energies = -1941.668926

**Table S12.** Optimized Cartesian coordinates (Å) obtained for the GdDO3A-*p*MAP·3H<sub>2</sub>O system (0 Imaginary Frequencies).

| Center<br>Number |   | Coordinates (Angstroms) |           |           |
|------------------|---|-------------------------|-----------|-----------|
|                  |   | X                       | Y         | Z         |
| 1                | 7 | -2.151799               | -2.074256 | -0.962882 |
| 2                | 6 | -3.552722               | -1.676731 | -1.230510 |
| 3                | 6 | -3.668383               | -0.304507 | -1.872542 |



|    |    |           |           |           |
|----|----|-----------|-----------|-----------|
| 4  | 7  | -3.111624 | 0.790562  | -1.048674 |
| 5  | 6  | -2.849504 | 1.972844  | -1.900369 |
| 6  | 6  | -1.580344 | 1.839386  | -2.726027 |
| 7  | 7  | -0.352795 | 1.664168  | -1.919575 |
| 8  | 6  | 0.734931  | 1.140813  | -2.773986 |
| 9  | 6  | 0.598177  | -0.348300 | -3.048949 |
| 10 | 7  | 0.610973  | -1.186514 | -1.829322 |
| 11 | 6  | 0.025385  | -2.518270 | -2.120111 |
| 12 | 6  | -1.491196 | -2.496164 | -2.213511 |
| 13 | 6  | -2.106530 | -3.142820 | 0.054087  |
| 14 | 6  | -0.932078 | -3.075715 | 1.038095  |
| 15 | 8  | -0.127813 | -2.090610 | 0.921722  |
| 16 | 8  | -0.884629 | -3.939606 | 1.912431  |
| 17 | 6  | -4.017810 | 1.148441  | 0.058988  |
| 18 | 6  | -3.781484 | 0.410178  | 1.379246  |
| 19 | 8  | -4.530305 | 0.657921  | 2.317612  |
| 20 | 8  | -2.761711 | -0.367595 | 1.432732  |
| 21 | 6  | 0.048453  | 2.936154  | -1.290962 |
| 22 | 6  | -0.714523 | 3.282195  | -0.005326 |
| 23 | 8  | -0.866555 | 4.453053  | 0.301724  |
| 24 | 8  | -1.101532 | 2.268815  | 0.692617  |
| 25 | 6  | 1.980007  | -1.354100 | -1.322069 |
| 26 | 6  | 2.423636  | -0.255699 | -0.377087 |
| 27 | 8  | 1.568930  | 0.444047  | 0.172567  |
| 28 | 1  | -2.996080 | -3.066234 | 0.680156  |
| 29 | 1  | -2.126132 | -4.137562 | -0.405744 |
| 30 | 1  | -5.070056 | 1.035452  | -0.225265 |
| 31 | 1  | -3.864626 | 2.200220  | 0.305531  |
| 32 | 1  | -0.027843 | 3.773516  | -1.992724 |
| 33 | 1  | 1.094384  | 2.848991  | -0.985311 |
| 34 | 1  | 2.022467  | -2.264893 | -0.717186 |
| 35 | 1  | 2.690663  | -1.477377 | -2.145284 |
| 36 | 1  | -4.085613 | -1.678088 | -0.281288 |
| 37 | 1  | -4.047073 | -2.409656 | -1.881159 |
| 38 | 1  | -4.726058 | -0.109957 | -2.092420 |
| 39 | 1  | -3.151405 | -0.302352 | -2.832189 |
| 40 | 1  | -3.689706 | 2.152207  | -2.583038 |
| 41 | 1  | -2.779047 | 2.848090  | -1.256588 |
| 42 | 1  | -1.485383 | 2.729631  | -3.361582 |
| 43 | 1  | -1.668715 | 0.988785  | -3.401406 |
| 44 | 1  | 0.763760  | 1.670483  | -3.734745 |
| 45 | 1  | 1.685413  | 1.345239  | -2.281580 |
| 46 | 1  | -0.335784 | -0.538499 | -3.576086 |
| 47 | 1  | 1.402341  | -0.655437 | -3.729842 |
| 48 | 1  | 0.326657  | -3.194685 | -1.321916 |
| 49 | 1  | 0.430545  | -2.919194 | -3.057611 |
| 50 | 1  | -1.805574 | -1.824681 | -3.012438 |
| 51 | 1  | -1.832453 | -3.498749 | -2.503320 |
| 52 | 8  | -2.147291 | 2.366747  | 3.241003  |
| 53 | 1  | -1.841727 | 2.471585  | 2.319191  |
| 54 | 1  | -0.818688 | 1.111417  | 3.653512  |
| 55 | 64 | -0.849115 | -0.011338 | 0.107621  |
| 56 | 8  | -0.152659 | 0.415481  | 3.781977  |
| 57 | 1  | -0.682205 | -0.398178 | 3.808649  |
| 58 | 6  | 3.838408  | -0.074637 | -0.073350 |
| 59 | 6  | 4.840399  | -0.881930 | -0.622413 |
| 60 | 6  | 4.207758  | 0.937987  | 0.830986  |
| 61 | 6  | 6.170275  | -0.699729 | -0.285461 |
| 62 | 6  | 5.524403  | 1.134043  | 1.166936  |
| 63 | 6  | 6.521227  | 0.313469  | 0.613256  |

|    |   |           |           |           |
|----|---|-----------|-----------|-----------|
| 64 | 1 | 6.919428  | -1.344134 | -0.723383 |
| 65 | 1 | 5.819594  | 1.911710  | 1.860082  |
| 66 | 1 | -2.976683 | 1.879718  | 3.171327  |
| 67 | 8 | -1.960297 | -1.774880 | 3.693731  |
| 68 | 1 | -1.565724 | -2.567398 | 3.307468  |
| 69 | 1 | -2.382863 | -1.320757 | 2.941572  |
| 70 | 1 | 3.436726  | 1.564523  | 1.261406  |
| 71 | 1 | 4.599157  | -1.676405 | -1.317139 |
| 72 | 8 | 7.772800  | 0.575766  | 1.004459  |
| 73 | 6 | 8.835504  | -0.222862 | 0.493535  |
| 74 | 1 | 9.741687  | 0.166776  | 0.950200  |
| 75 | 1 | 8.705892  | -1.271512 | 0.773810  |
| 76 | 1 | 8.905379  | -0.132052 | -0.593597 |

-----  
E(RwB97XD) = -1981.4902999 Hartree

Zero-point correction = 0.630152

Thermal correction to Energy = 0.670144

Thermal correction to Enthalpy = 0.671088

Thermal correction to Gibbs Free Energy = 0.559843

Sum of electronic and zero-point Energies = -1980.860148

Sum of electronic and thermal Energies = -1980.820156

Sum of electronic and thermal Enthalpies = -1980.819211

Sum of electronic and thermal Free Energies = -1980.930457

**Table S13.** Optimized Cartesian coordinates (Å) obtained for the GdDO3A-*o*MAP·3H<sub>2</sub>O system (0 Imaginary Frequencies).

| Center<br>Number |   | Coordinates (Angstroms) |           |           |
|------------------|---|-------------------------|-----------|-----------|
|                  |   | X                       | Y         | Z         |
| 1                | 7 | -1.683417               | -2.190900 | -1.018841 |
| 2                | 6 | -3.075698               | -1.946709 | -1.455815 |
| 3                | 6 | -3.259869               | -0.594618 | -2.123078 |
| 4                | 7 | -2.929693               | 0.553697  | -1.253718 |
| 5                | 6 | -2.703716               | 1.757160  | -2.084613 |
| 6                | 6 | -1.342382               | 1.767370  | -2.761065 |
| 7                | 7 | -0.198143               | 1.732800  | -1.825443 |
| 8                | 6 | 1.022506                | 1.325630  | -2.551794 |
| 9                | 6 | 1.075323                | -0.171932 | -2.811975 |
| 10               | 7 | 1.048351                | -0.997320 | -1.584497 |
| 11               | 6 | 0.651408                | -2.386803 | -1.917313 |
| 12               | 6 | -0.838209               | -2.538171 | -2.178886 |
| 13               | 6 | -1.647417               | -3.252246 | 0.003468  |
| 14               | 6 | -0.592849               | -3.078610 | 1.102530  |
| 15               | 8 | 0.114335                | -2.019133 | 1.073117  |
| 16               | 8 | -0.554903               | -3.943291 | 1.979861  |
| 17               | 6 | -3.994577               | 0.808236  | -0.264830 |
| 18               | 6 | -3.823116               | 0.120761  | 1.093551  |
| 19               | 8 | -4.660953               | 0.355437  | 1.960802  |
| 20               | 8 | -2.779374               | -0.603326 | 1.249940  |
| 21               | 6 | -0.009462               | 3.044236  | -1.184267 |
| 22               | 6 | -0.951114               | 3.310208  | -0.003568 |
| 23               | 8 | -1.262958               | 4.460217  | 0.264961  |
| 24               | 8 | -1.307691               | 2.265137  | 0.658795  |
| 25               | 6 | 2.372567                | -1.011022 | -0.946271 |
| 26               | 6 | 2.587618                | 0.145108  | 0.005026  |
| 27               | 8 | 1.604315                | 0.749818  | 0.433164  |

|    |    |           |           |           |
|----|----|-----------|-----------|-----------|
| 28 | 1  | -2.600224 | -3.255483 | 0.533996  |
| 29 | 1  | -1.529602 | -4.244606 | -0.447552 |
| 30 | 1  | -4.984010 | 0.552201  | -0.662305 |
| 31 | 1  | -4.010475 | 1.874388  | -0.036685 |
| 32 | 1  | -0.095625 | 3.863529  | -1.906624 |
| 33 | 1  | 0.997963  | 3.075530  | -0.761284 |
| 34 | 1  | 2.468549  | -1.907364 | -0.327539 |
| 35 | 1  | 3.178646  | -1.058643 | -1.684025 |
| 36 | 1  | -3.714133 | -2.004650 | -0.576388 |
| 37 | 1  | -3.407504 | -2.728049 | -2.152126 |
| 38 | 1  | -4.298578 | -0.516730 | -2.470967 |
| 39 | 1  | -2.635257 | -0.536294 | -3.014397 |
| 40 | 1  | -3.474484 | 1.841005  | -2.861846 |
| 41 | 1  | -2.806072 | 2.635185  | -1.449259 |
| 42 | 1  | -1.278804 | 2.661907  | -3.395283 |
| 43 | 1  | -1.261082 | 0.911702  | -3.431114 |
| 44 | 1  | 1.094793  | 1.847037  | -3.515186 |
| 45 | 1  | 1.888321  | 1.637445  | -1.968091 |
| 46 | 1  | 0.227967  | -0.462574 | -3.431536 |
| 47 | 1  | 1.975855  | -0.395026 | -3.398894 |
| 48 | 1  | 0.937613  | -3.022475 | -1.081353 |
| 49 | 1  | 1.199791  | -2.741480 | -2.799355 |
| 50 | 1  | -1.132344 | -1.909109 | -3.018882 |
| 51 | 1  | -1.028874 | -3.573849 | -2.490598 |
| 52 | 8  | -2.486678 | 2.162425  | 3.105848  |
| 53 | 1  | -2.221438 | 2.420208  | 2.201356  |
| 54 | 1  | -1.063751 | 1.020616  | 2.966900  |
| 55 | 64 | -0.731546 | 0.002946  | 0.183854  |
| 56 | 8  | -0.419508 | 0.351070  | 2.660066  |
| 57 | 1  | -0.712041 | -0.470410 | 3.103139  |
| 58 | 6  | 3.930755  | 0.572433  | 0.424730  |
| 59 | 6  | 5.099342  | -0.206973 | 0.275030  |
| 60 | 6  | 4.033256  | 1.841971  | 1.011921  |
| 61 | 6  | 6.328087  | 0.311332  | 0.691436  |
| 62 | 6  | 5.249803  | 2.352961  | 1.416429  |
| 63 | 6  | 6.394958  | 1.577833  | 1.250180  |
| 64 | 1  | 7.232373  | -0.271514 | 0.587639  |
| 65 | 1  | 5.311726  | 3.340647  | 1.854718  |
| 66 | 1  | -3.282439 | 1.629561  | 2.980669  |
| 67 | 8  | -1.862388 | -1.817808 | 3.586613  |
| 68 | 1  | -1.451456 | -2.638019 | 3.280504  |
| 69 | 1  | -2.398572 | -1.514065 | 2.831314  |
| 70 | 1  | 3.125880  | 2.421390  | 1.127330  |
| 71 | 1  | 7.359031  | 1.961395  | 1.563724  |
| 72 | 8  | 4.957537  | -1.436112 | -0.242195 |
| 73 | 6  | 6.105269  | -2.259430 | -0.419238 |
| 74 | 1  | 6.822729  | -1.789360 | -1.096333 |
| 75 | 1  | 6.580086  | -2.476885 | 0.540657  |
| 76 | 1  | 5.735937  | -3.181468 | -0.860795 |

-----  
E (RwB97XD) = -1981.4964259 Hartree

Zero-point correction = 0.630709

Thermal correction to Energy = 0.670188

Thermal correction to Enthalpy = 0.671132

Thermal correction to Gibbs Free Energy = 0.561295

Sum of electronic and zero-point Energies = -1980.865717

Sum of electronic and thermal Energies = -1980.826238

Sum of electronic and thermal Enthalpies = -1980.825294

Sum of electronic and thermal Free Energies = -1980.935131
